# Supplementary material
Source: Elsevier journal article supplement (https://comptes-rendus.academie-sciences.fr/chimie/article/10.1016/j.crci.2019.01.008/file/attach/mmc1.pdf)

# Supporting Information

## Contents:

|                                                                                   |        |
|-----------------------------------------------------------------------------------|--------|
| $^1\text{H}$ , $^{13}\text{C}\{^1\text{H}\}$ and $^{19}\text{F}$ NMR spectra..... | S1-S17 |
| <i>tert</i> -Butyl N-(4-bromo-2,6-dimethylphenyl)carbamate .....                  | S1     |
| <i>tert</i> -Butyl N-(4-iodophenyl)carbamate .....                                | S1     |
| <i>tert</i> -Butyl N-(3-bromophenyl)carbamate .....                               | S2     |
| Compound <b>6</b> .....                                                           | S3     |
| Compound <b>6'</b> .....                                                          | S4     |
| Compound <b>6''</b> .....                                                         | S5     |
| Compound <b>7</b> .....                                                           | S6     |
| Compound <b>7'</b> .....                                                          | S7     |
| Compound <b>7''</b> .....                                                         | S8     |
| Compound <b>1</b> .....                                                           | S9     |
| Compound <b>2</b> .....                                                           | S11    |
| Compound <b>3</b> .....                                                           | S13    |
| Compound <b>8</b> .....                                                           | S15    |
| Compound <b>9</b> .....                                                           | S16    |
| Compound <b>10</b> .....                                                          | S17    |
| Calculated, optimised structure of complex <b>9</b> .....                         | S18    |



$^1\text{H}$  NMR ( $\text{CDCl}_3$ , 400 MHz) of *tert*-butyl N-(4-bromo-2,6-dimethylphenyl)carbamate

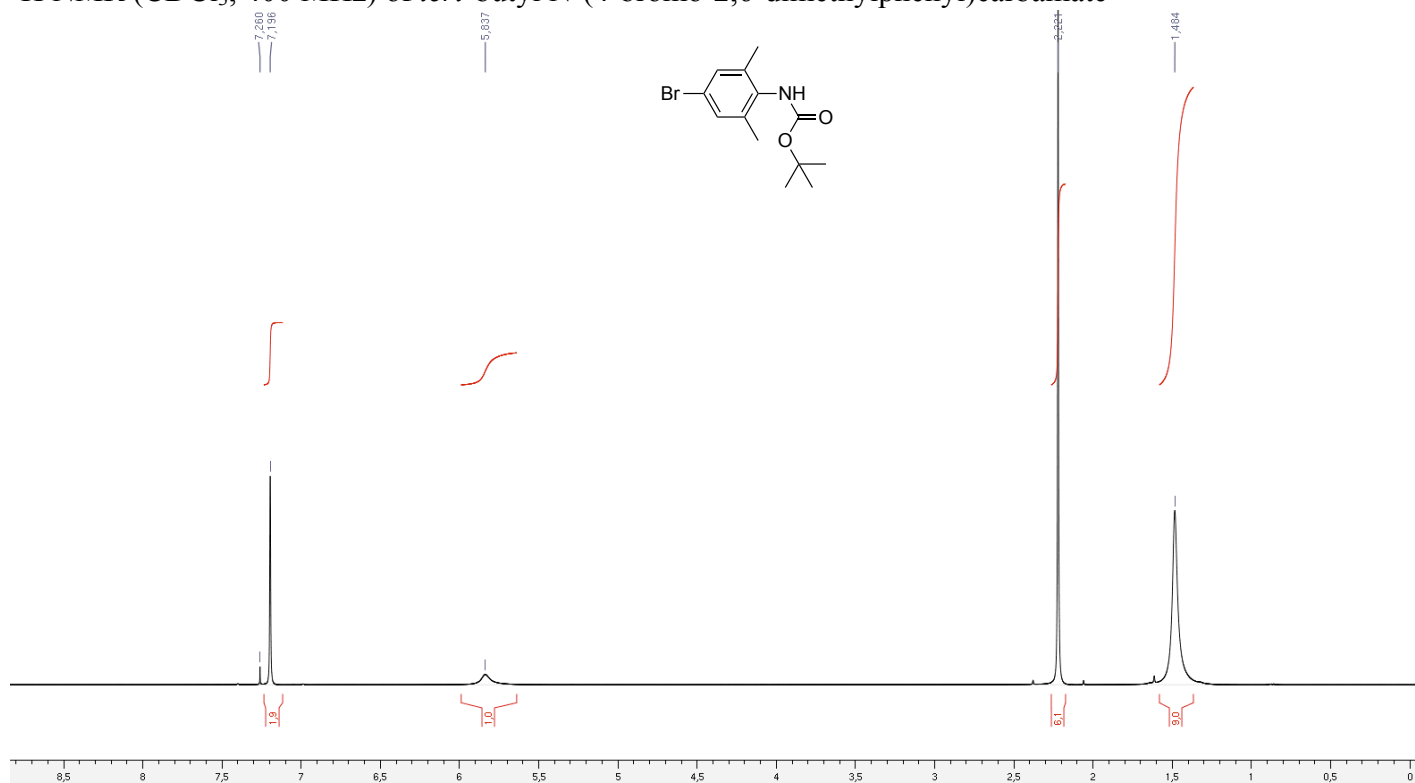

$^1\text{H}$  NMR ( $\text{CDCl}_3$ , 500 MHz) of *tert*-butyl N-(4-iodophenyl)carbamate

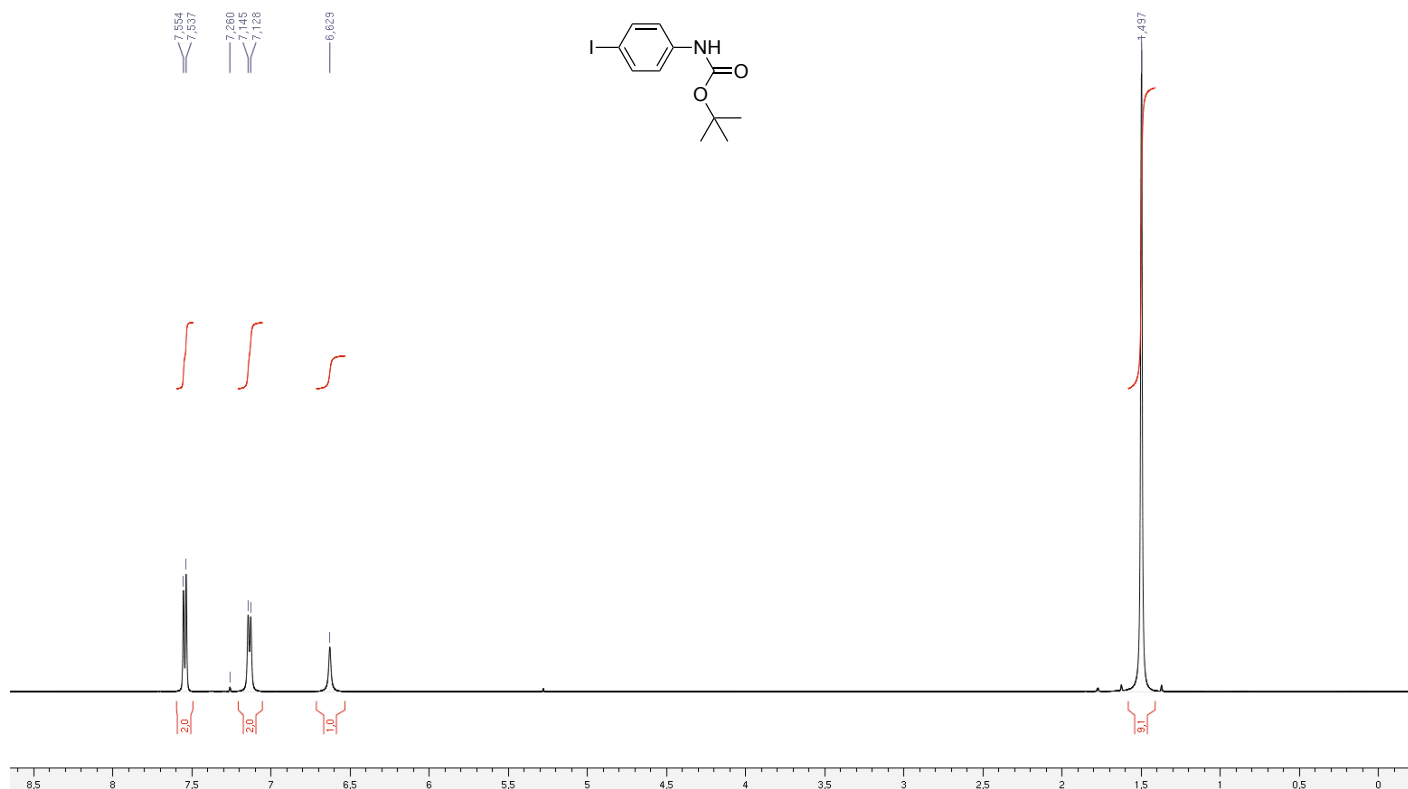

$^1\text{H}$  NMR ( $\text{CDCl}_3$ , 300 MHz) of *tert*-butyl N-(3-bromophenyl)carbamate

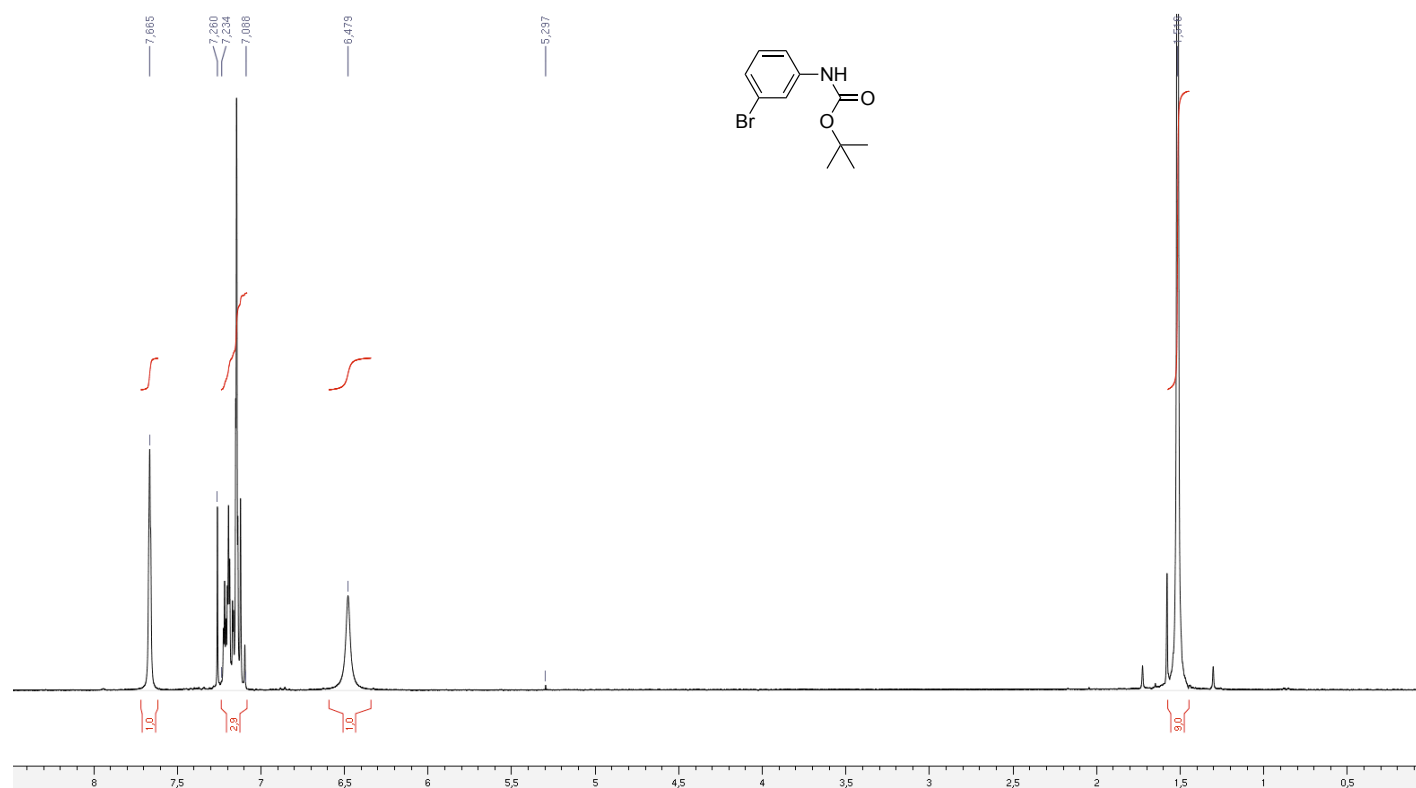

$^1\text{H}$  NMR ( $\text{CDCl}_3$ , 400 MHz) of **6**

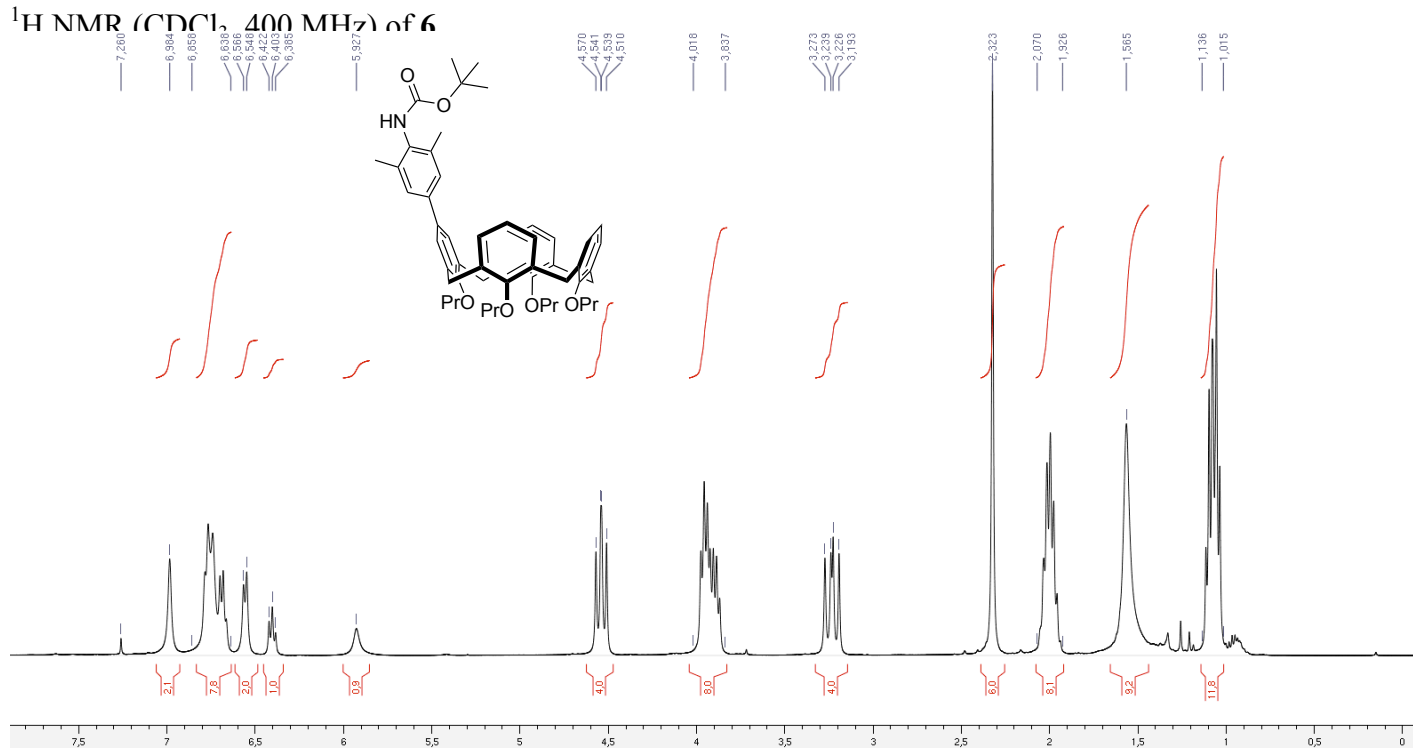

$^{13}\text{C}\{^1\text{H}\}$  and DEPT NMR ( $\text{CDCl}_3$ , 125 MHz) of **6**

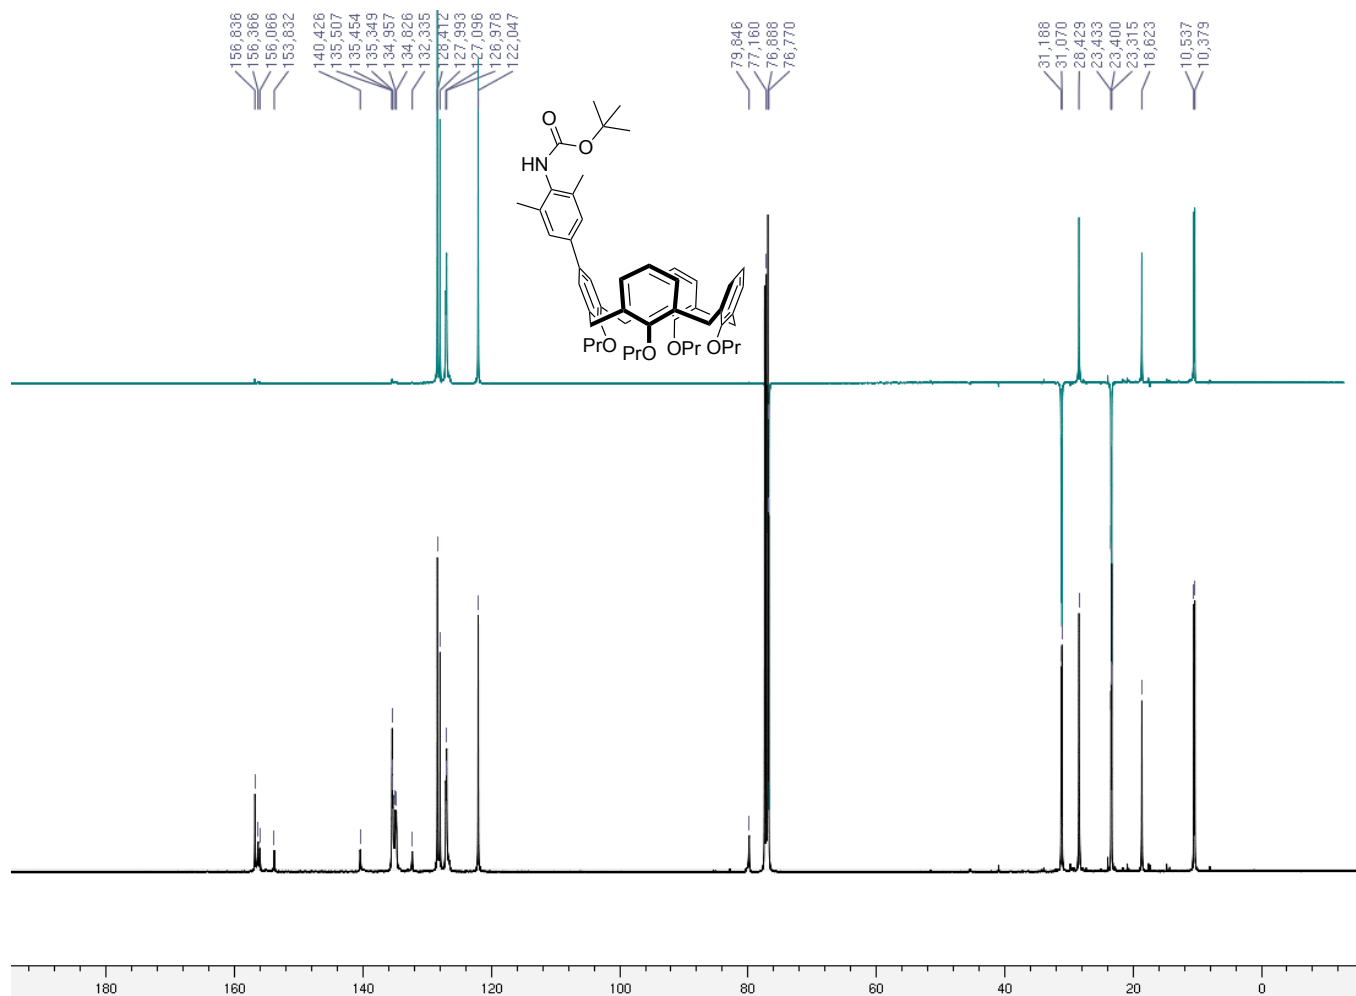

$^1\text{H}$  NMR ( $\text{CDCl}_3$ , 500 MHz) of **6'**

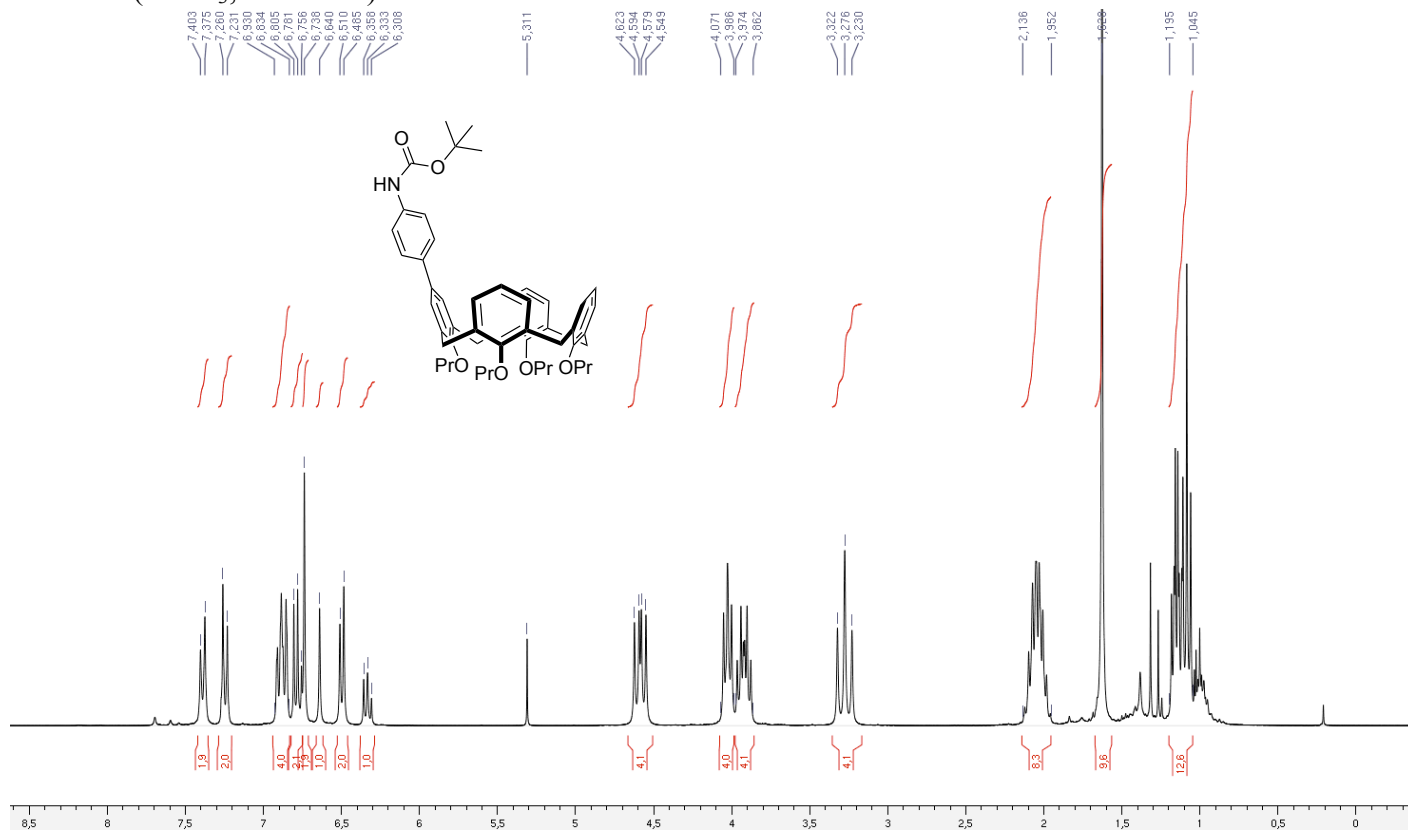

$^{13}\text{C}\{^1\text{H}\}$  and DEPT NMR ( $\text{CDCl}_3$ , 125 MHz) of **6'**

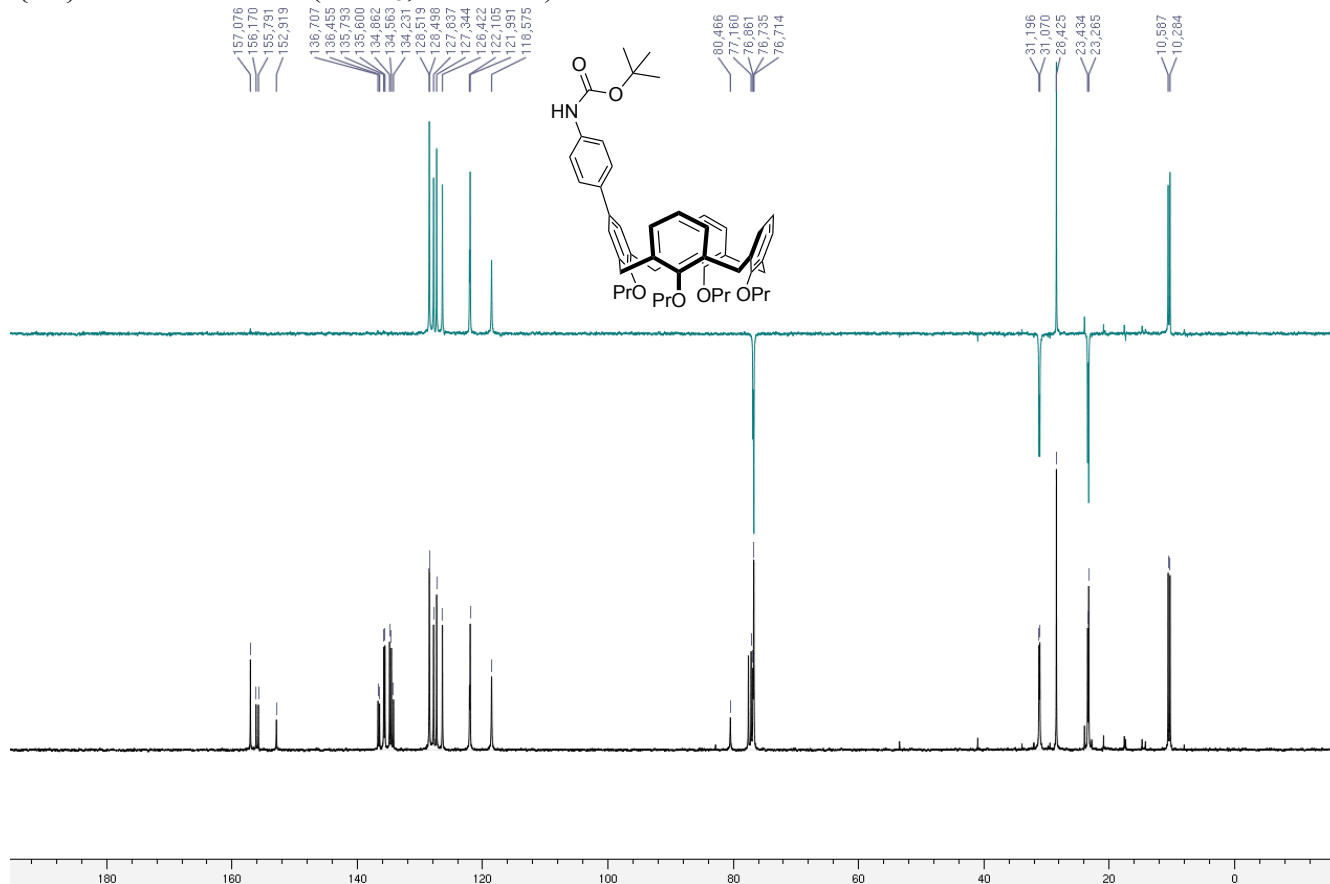

$^1\text{H}$  NMR ( $\text{CDCl}_3$ , 500 MHz) of **6''**

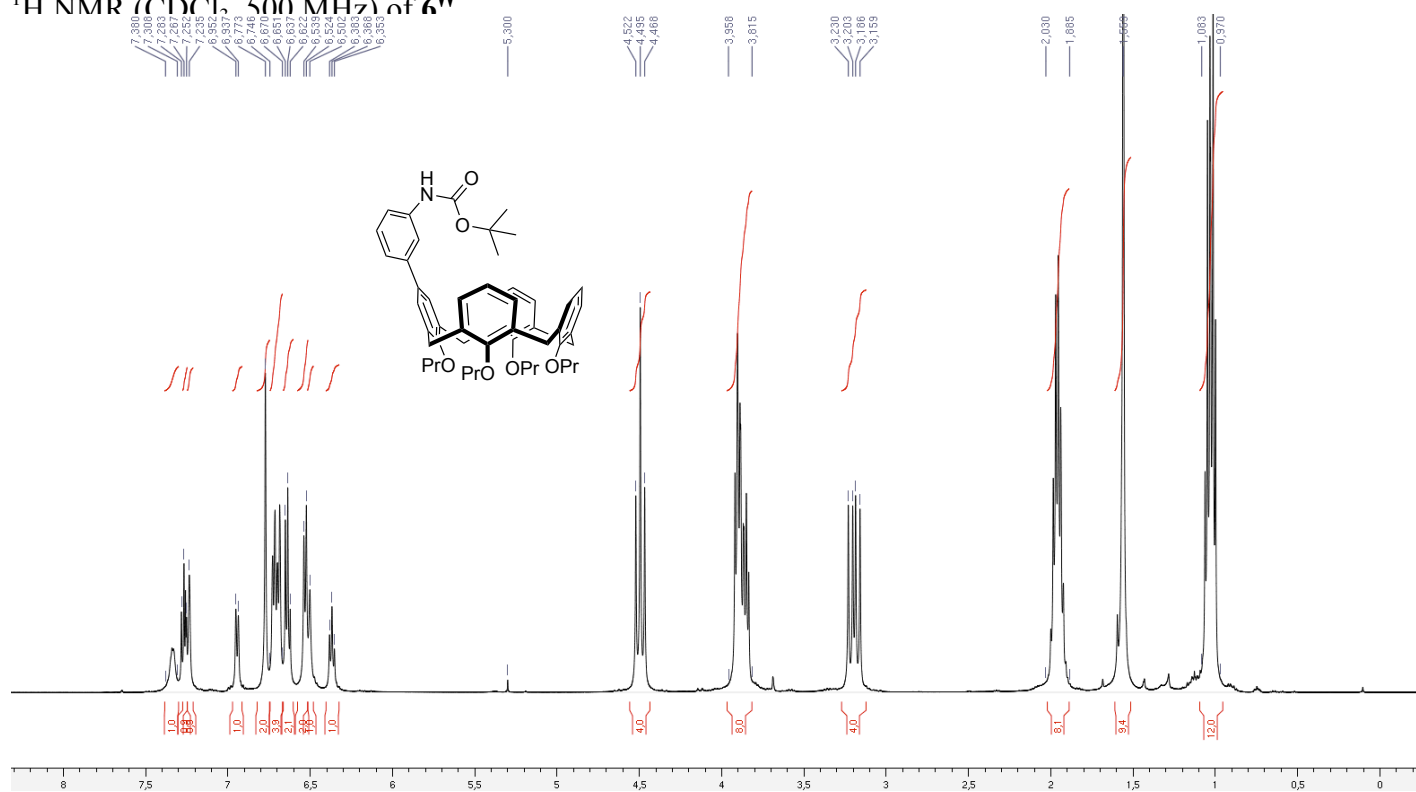

$^{13}\text{C}$  ( $^1\text{H}$ ) and DEPT NMR ( $\text{CDCl}_3$ , 125 MHz) of **6''**

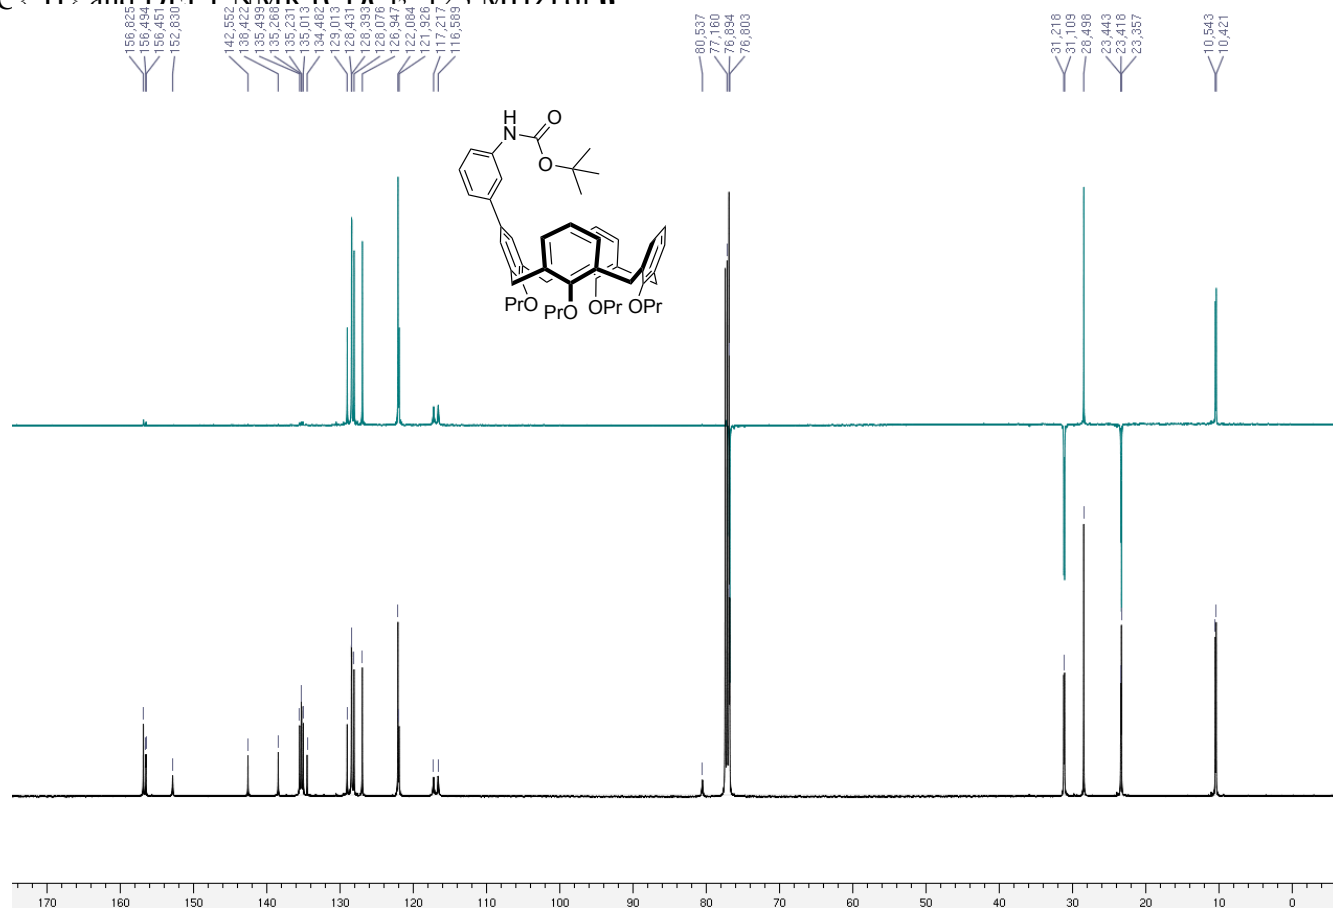



<sup>1</sup>H NMR (CDCl<sub>3</sub>, 500 MHz) of **7**

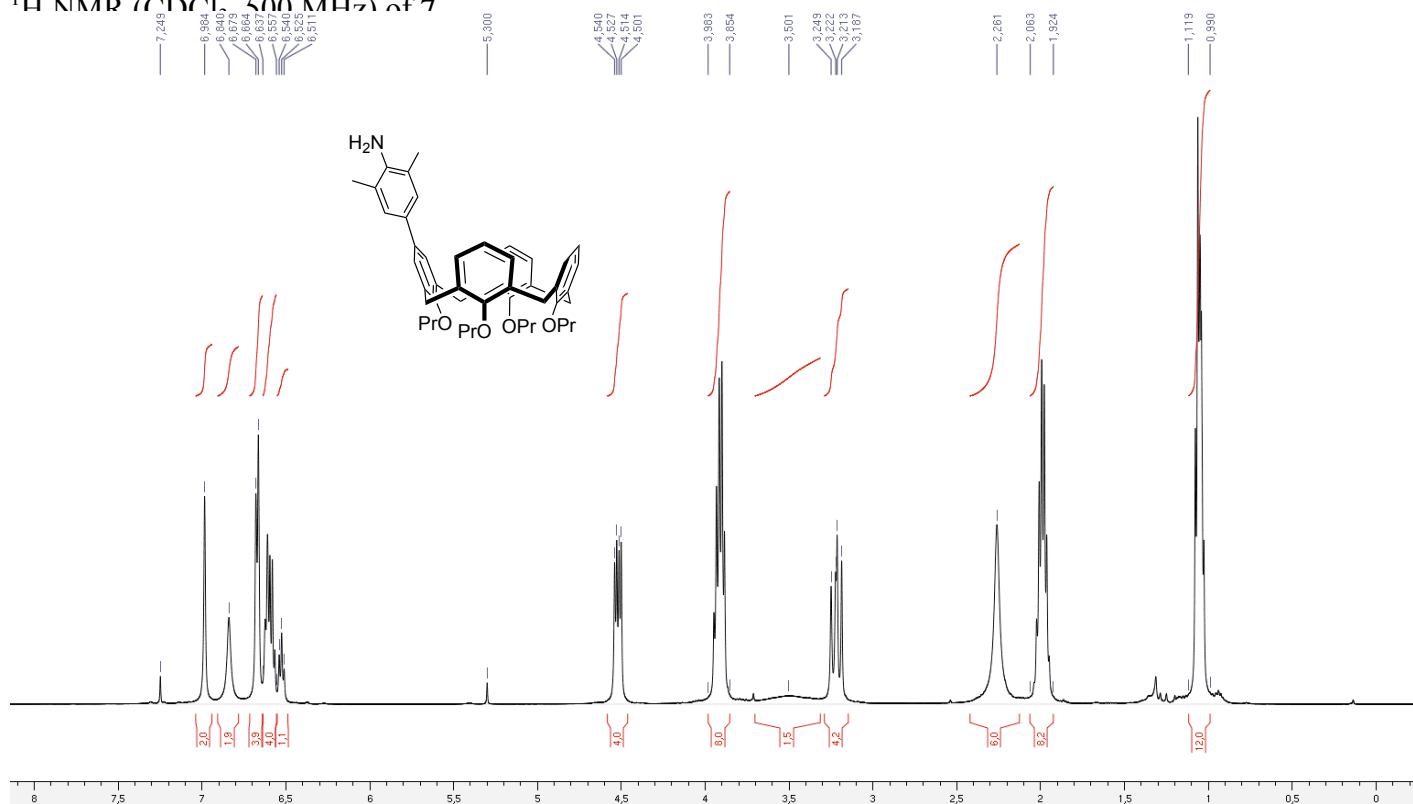

<sup>13</sup>C NMR and DEPT NMR (CDCl<sub>3</sub>, 125 MHz) of **7**

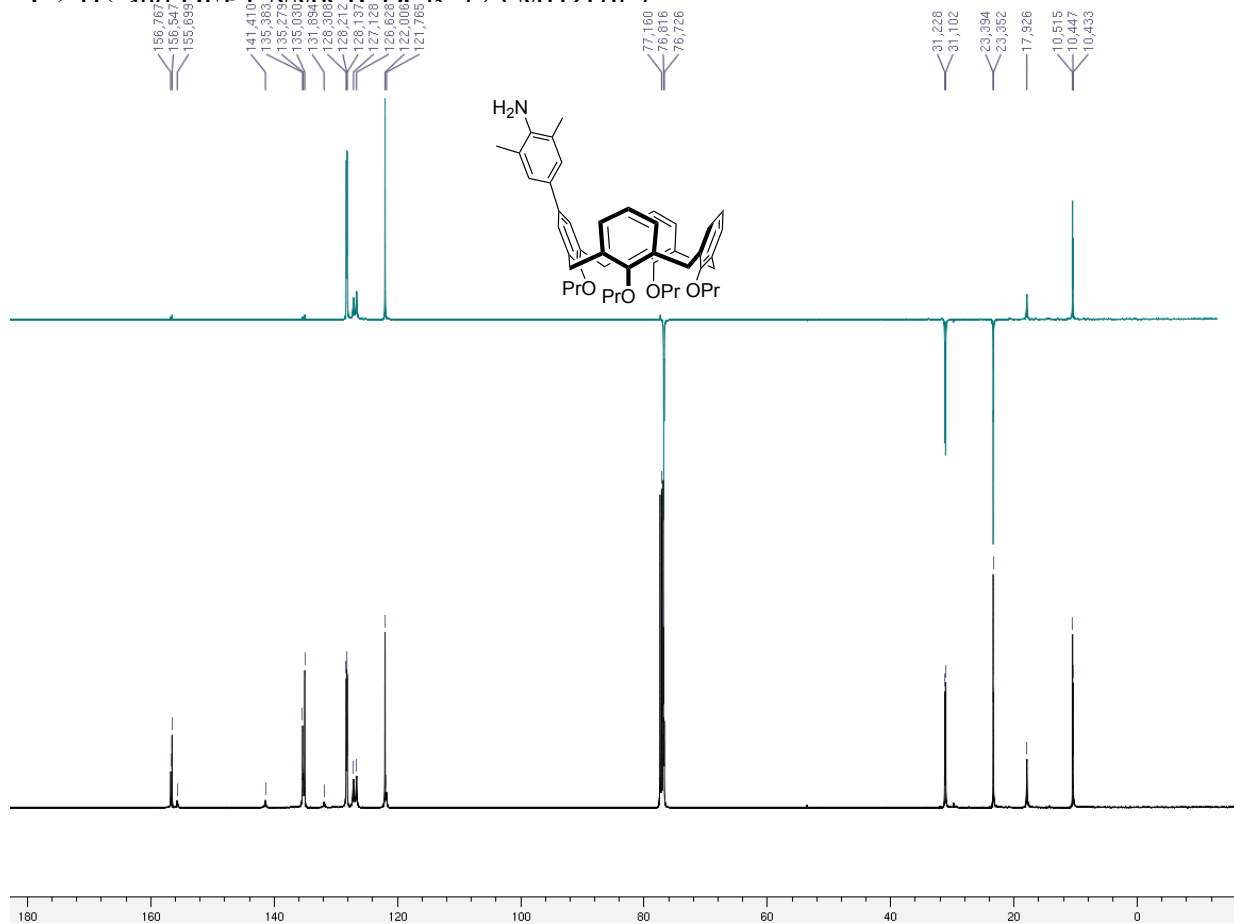

$^1\text{H}$  NMR ( $\text{CDCl}_3$ , 500 MHz) of **7'**

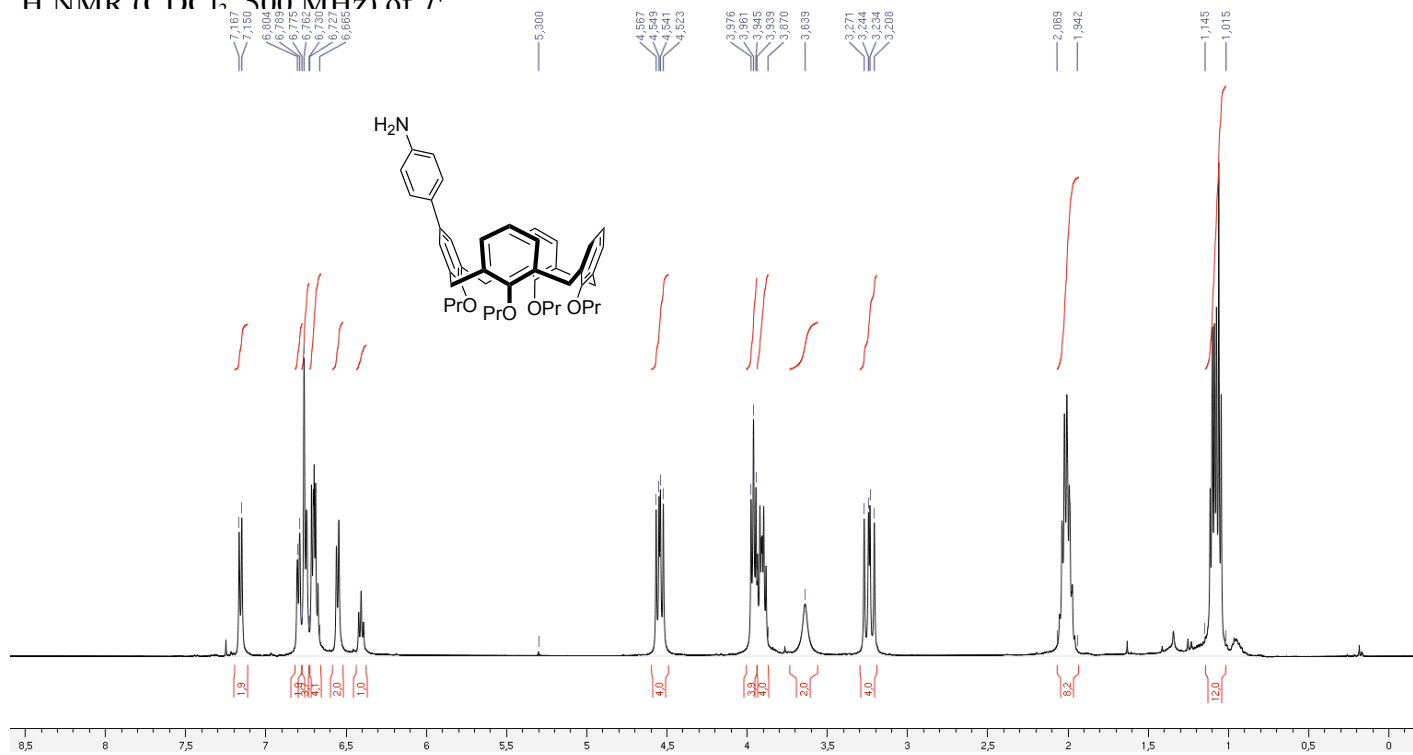

$^{13}\text{C}$  ( $^1\text{H}$ ) and DEPT NMR ( $\text{CDCl}_3$ , 125 MHz) of **7'**

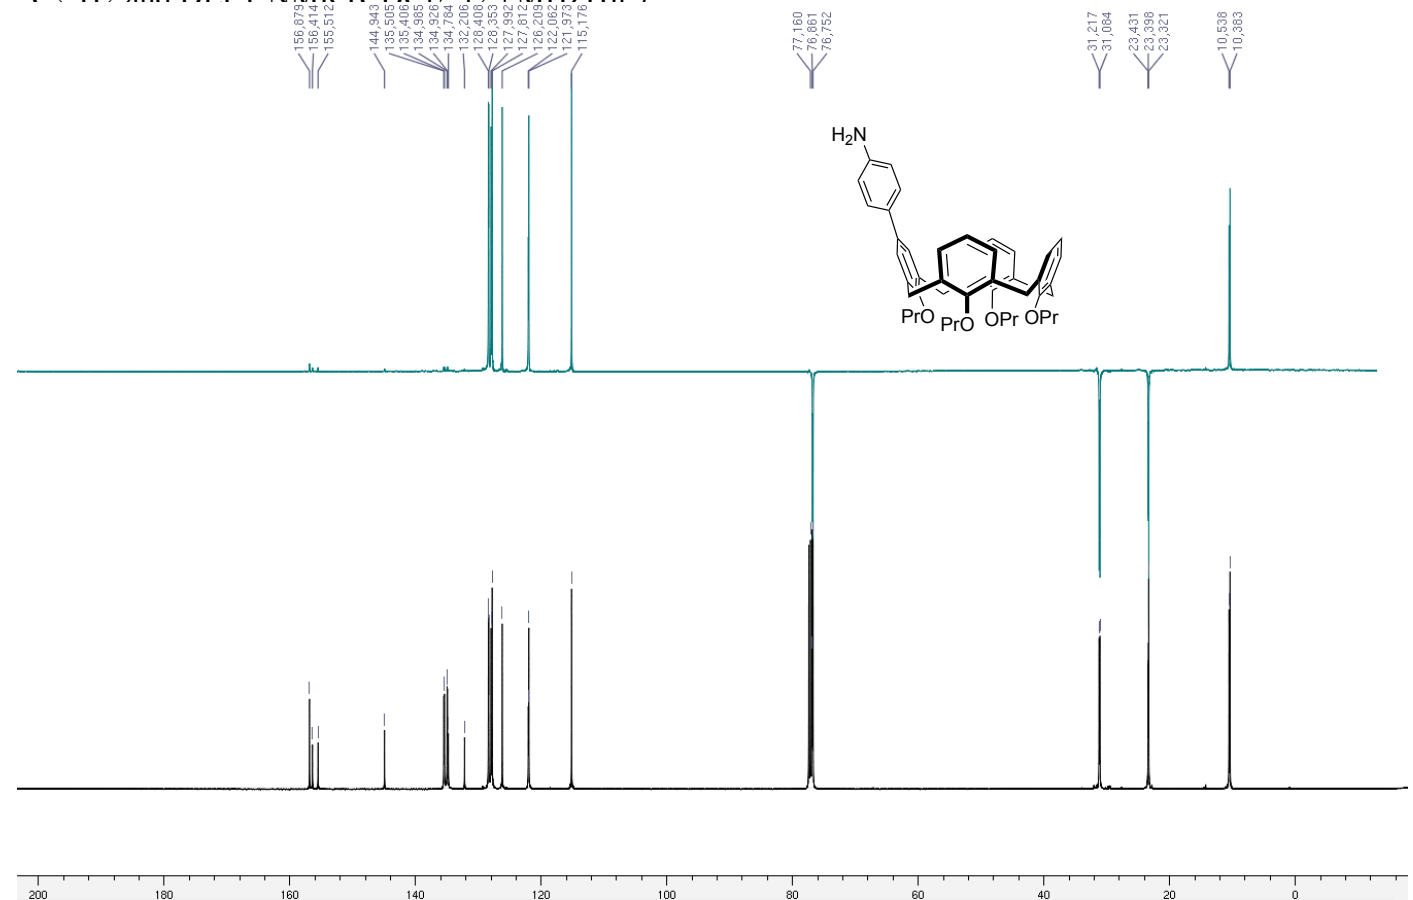

$^1\text{H}$  NMR ( $\text{CDCl}_3$ , 500 MHz) of **7''**

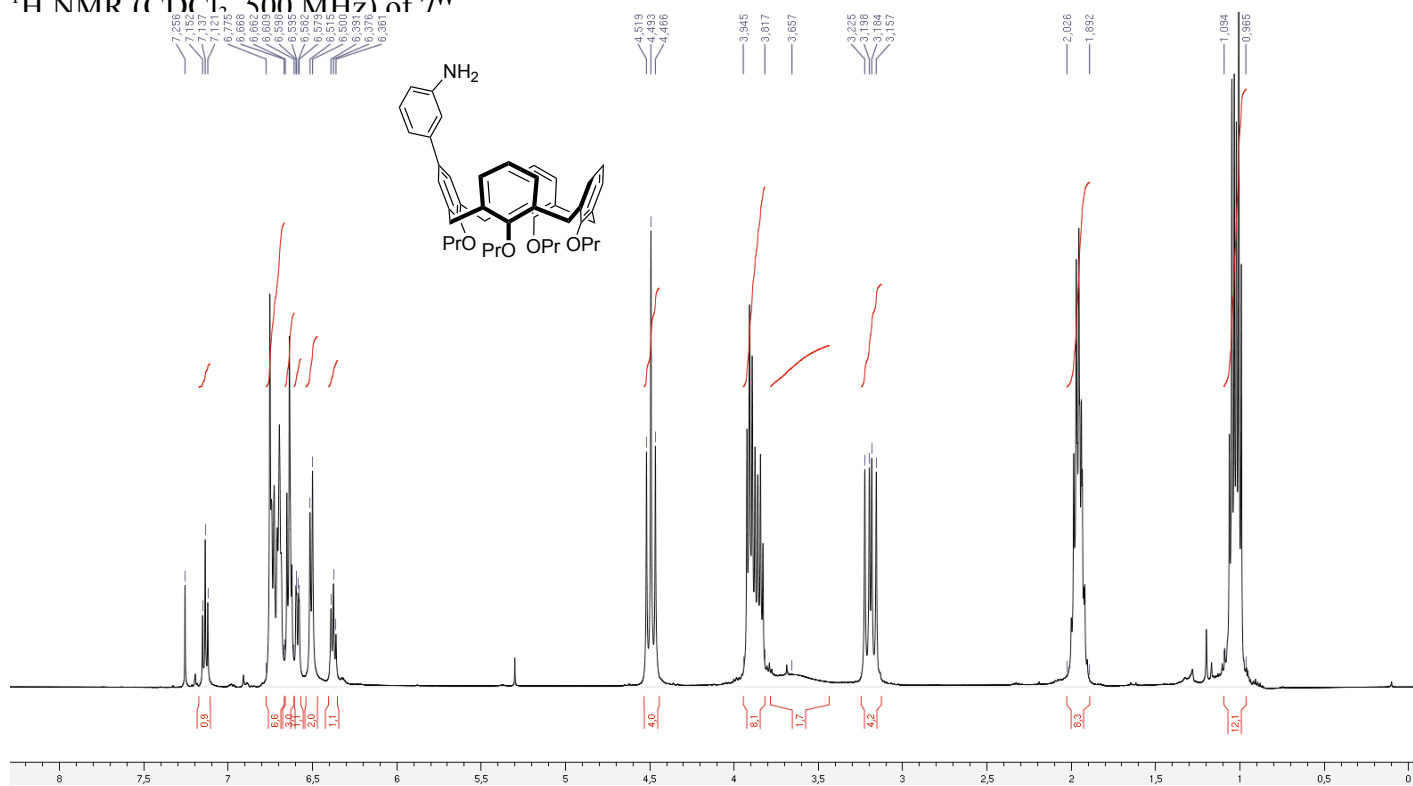

$^{13}\text{C}$   $^1\text{H}$  and DEPT NMR ( $\text{CDCl}_3$ , 125 MHz) of **7''**

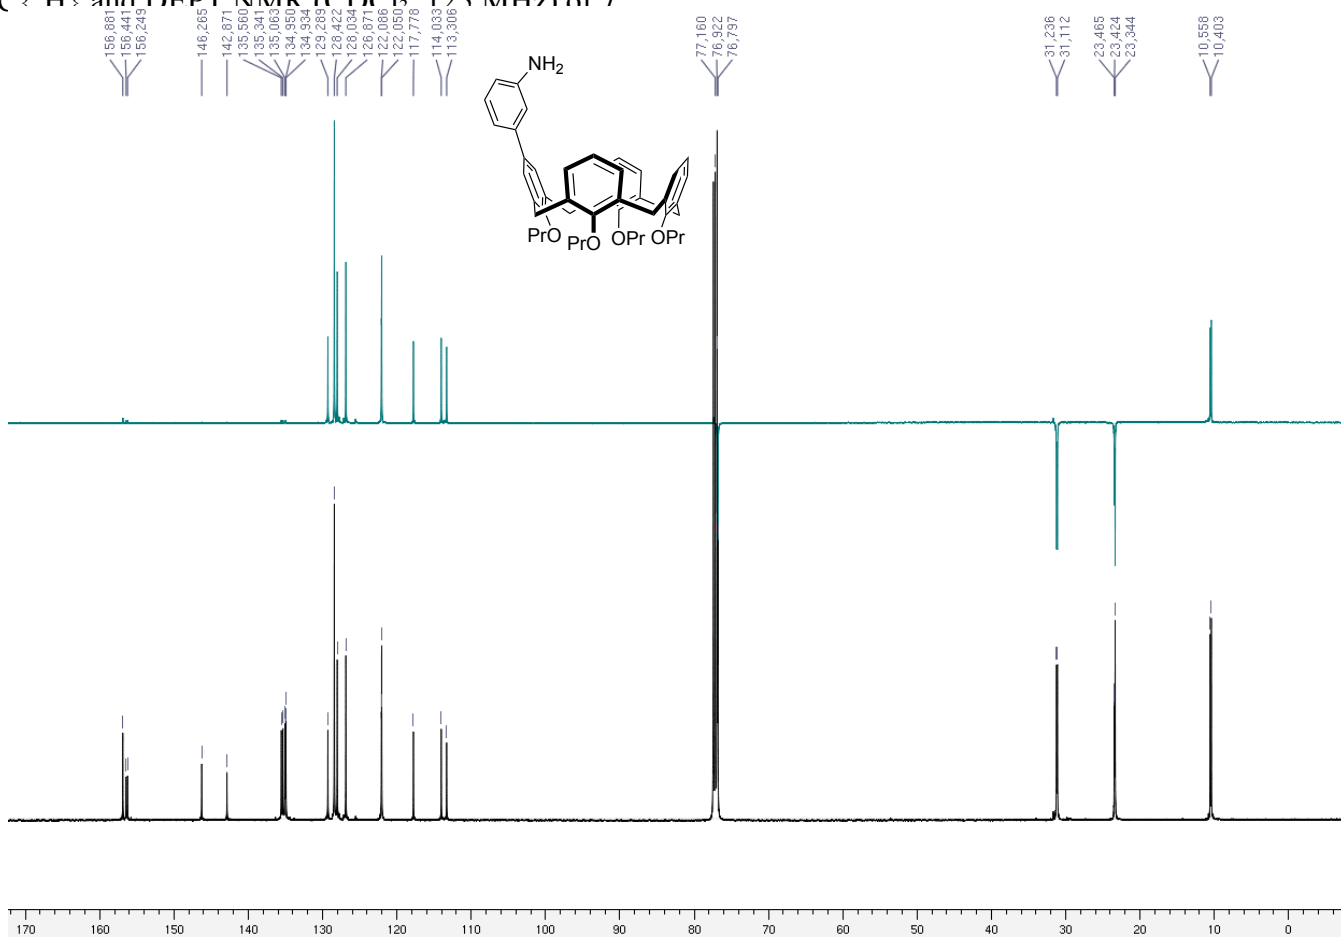

$^1\text{H}$  NMR ( $\text{CDCl}_3$ , 500 MHz) of **1**

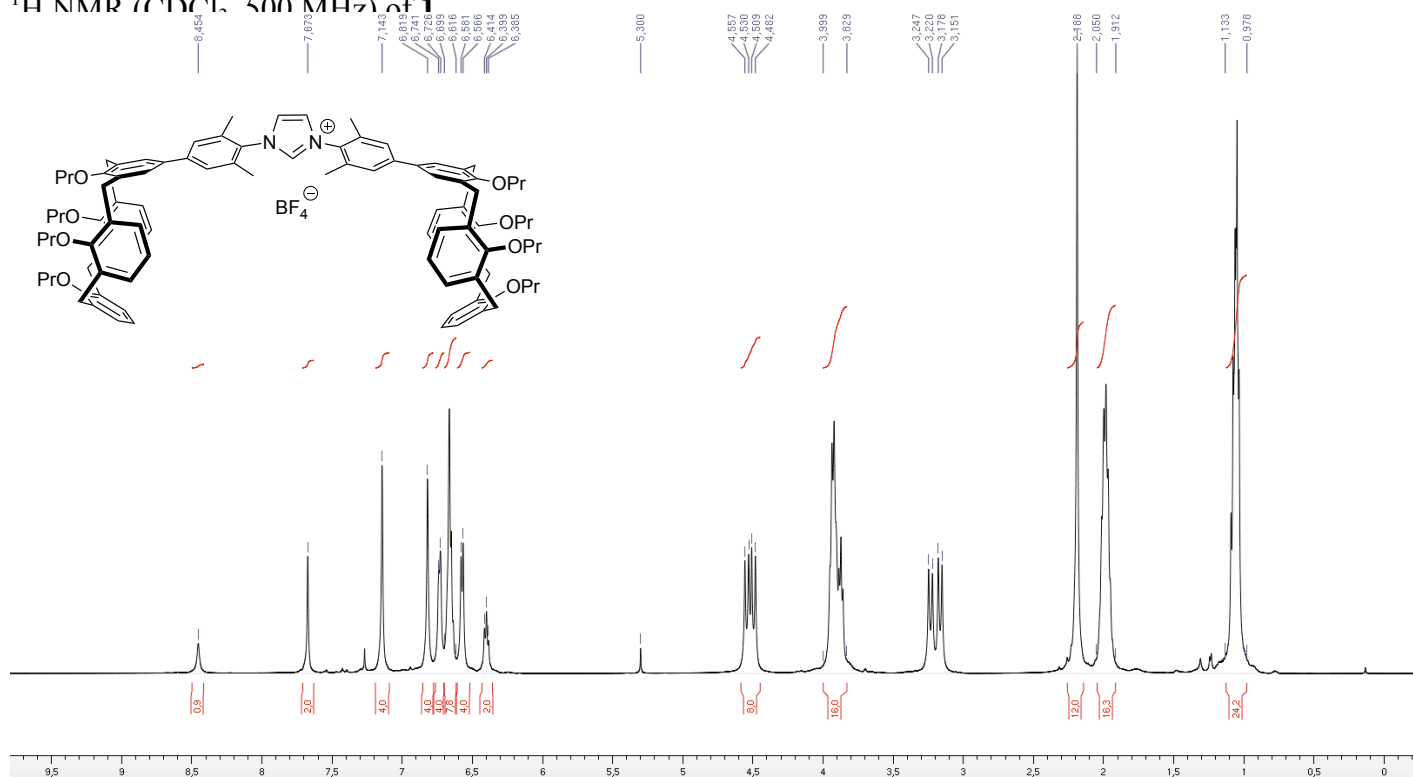

$^{13}\text{C}\{^1\text{H}\}$  and DEPT NMR ( $\text{CDCl}_3$ , 125 MHz) of **1**

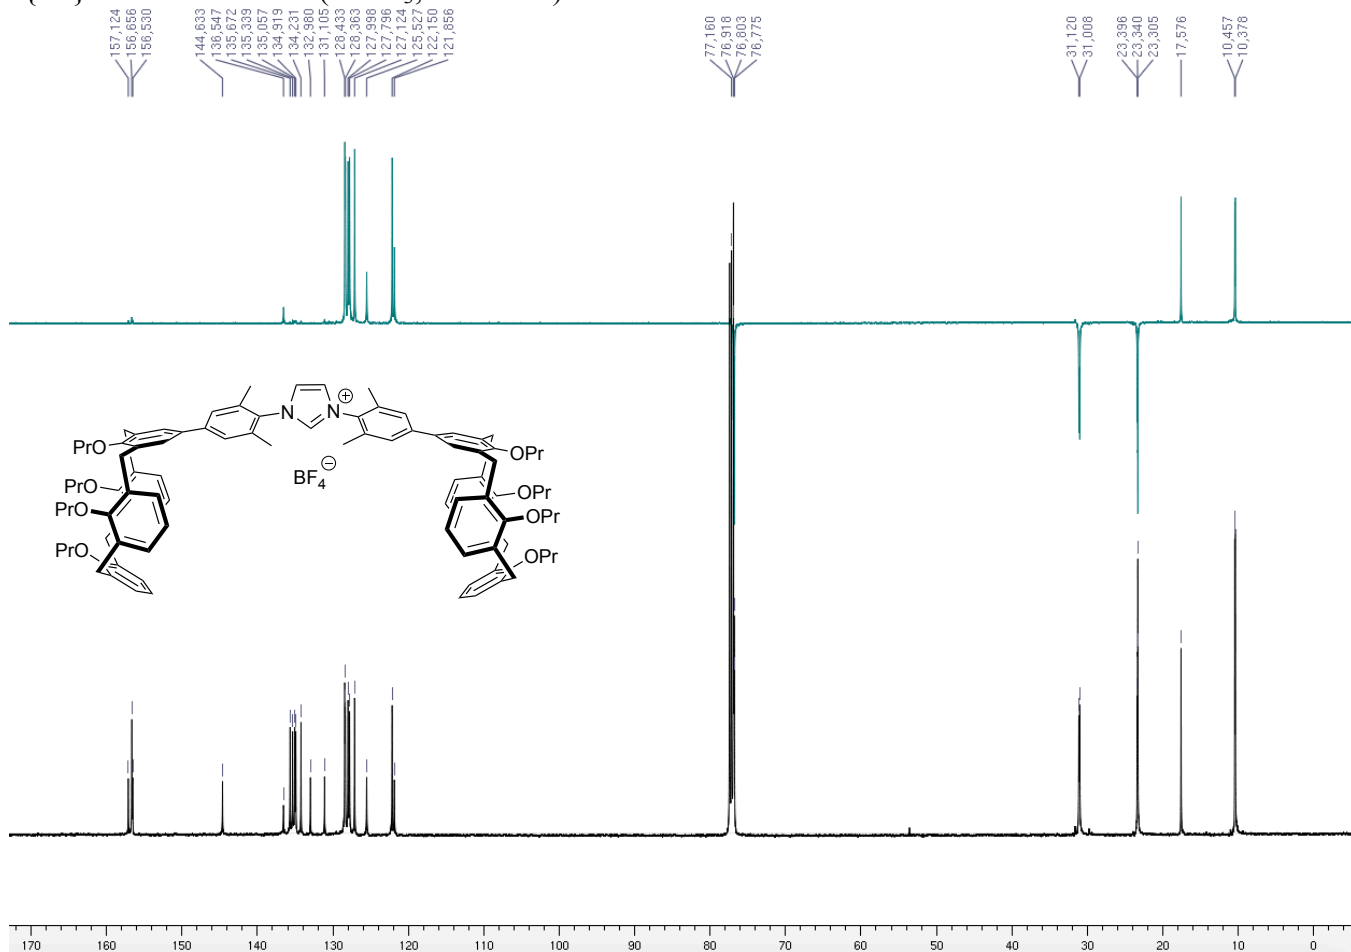

$^{19}\text{F}$  NMR ( $\text{CDCl}_3$ , 282 MHz; ref.  $\text{CFCl}_3$ ) of **1**

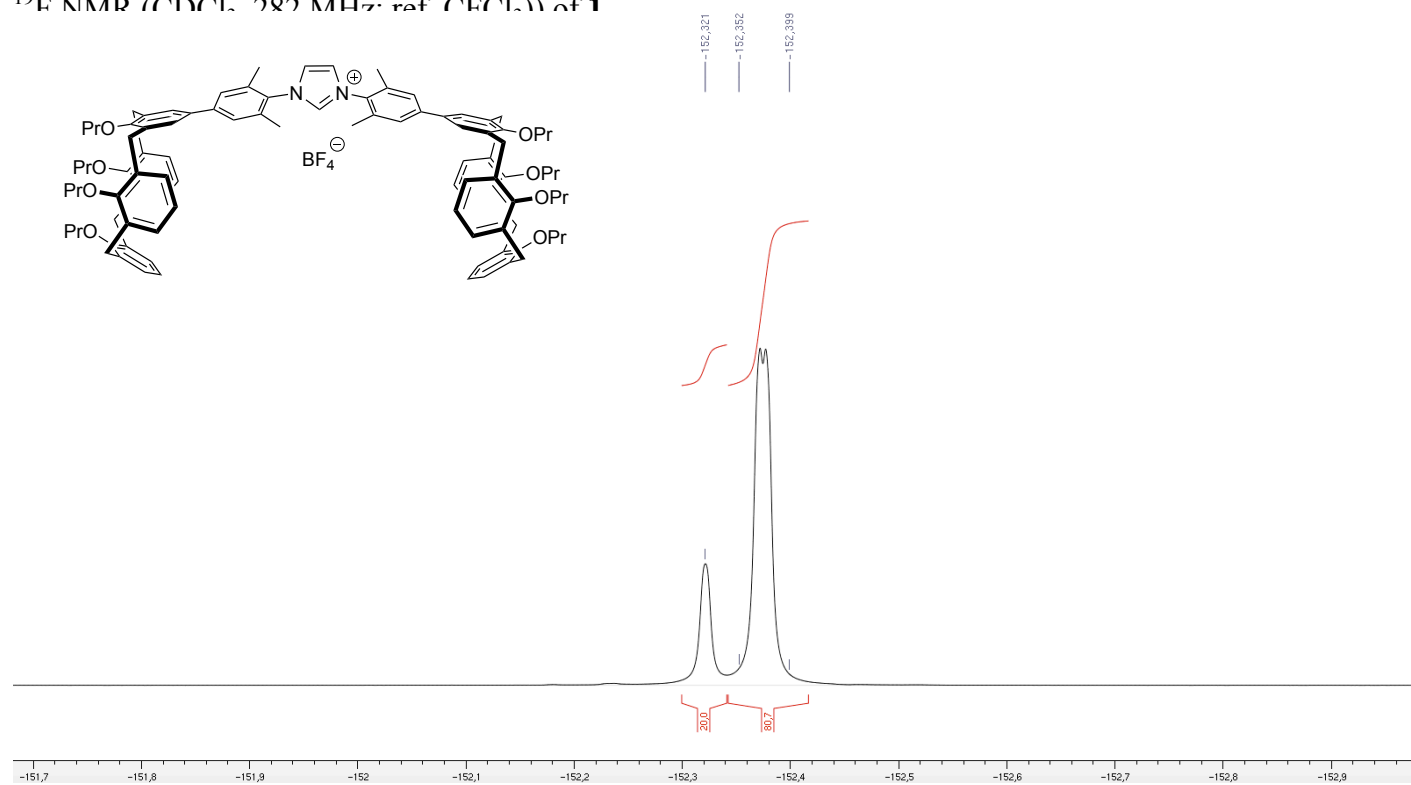

$^1\text{H}$  NMR ( $\text{CDCl}_3$ , 500 MHz) of **2**

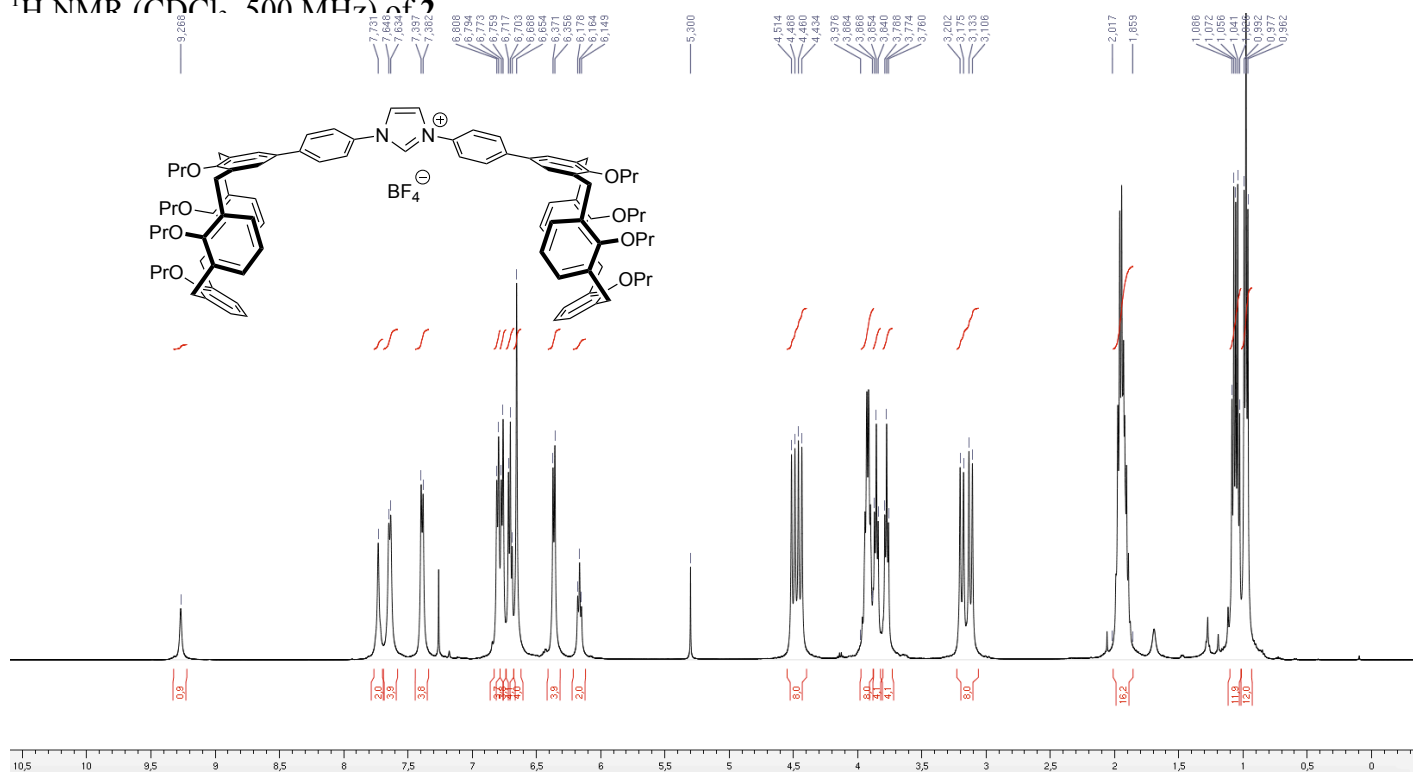

$^{13}\text{C}\{^1\text{H}\}$  and DEPT NMR ( $\text{CDCl}_3$ , 125 MHz) of **2**

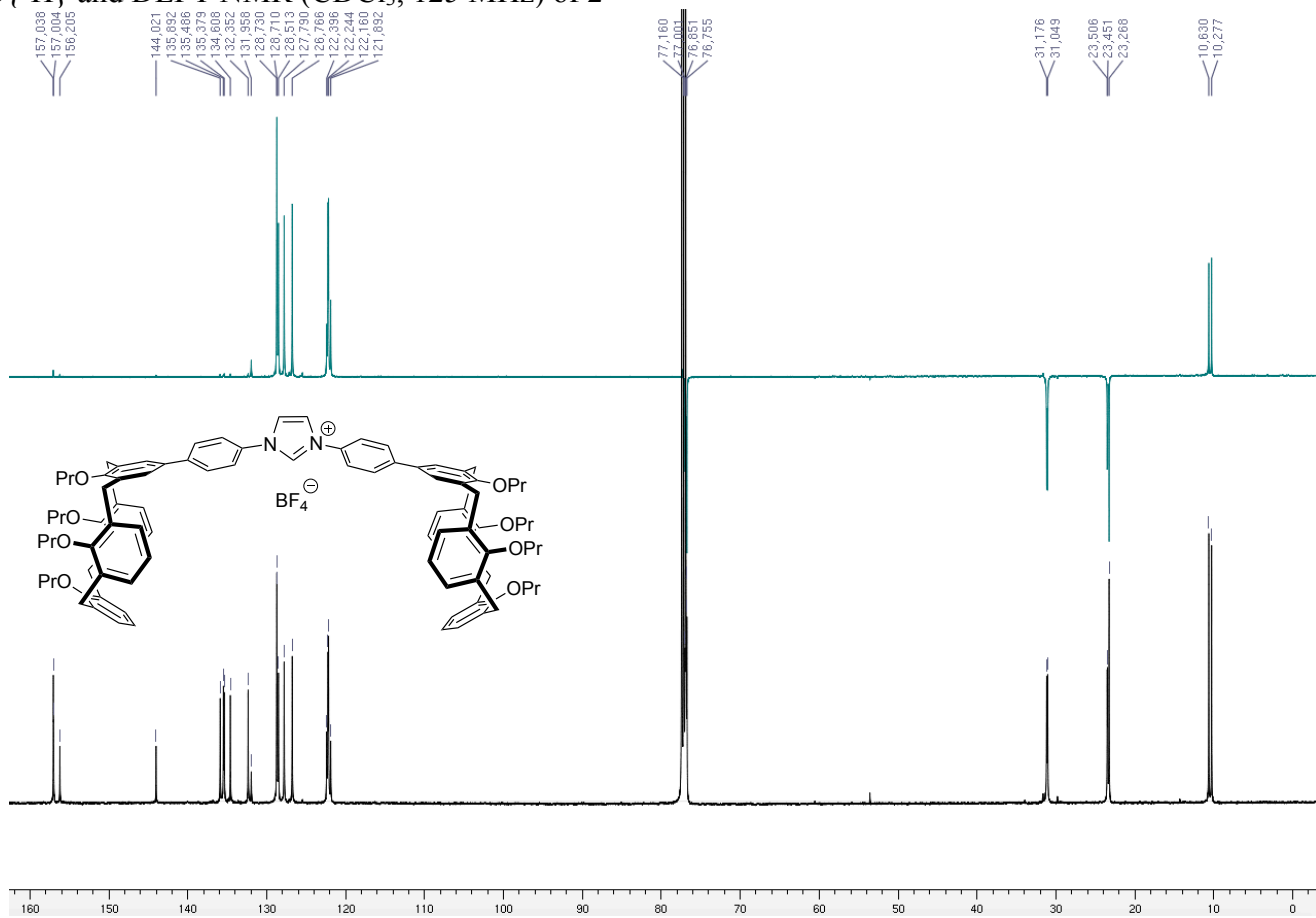

$^{19}\text{F}$  NMR ( $\text{CDCl}_3$ , 282 MHz) of **2**

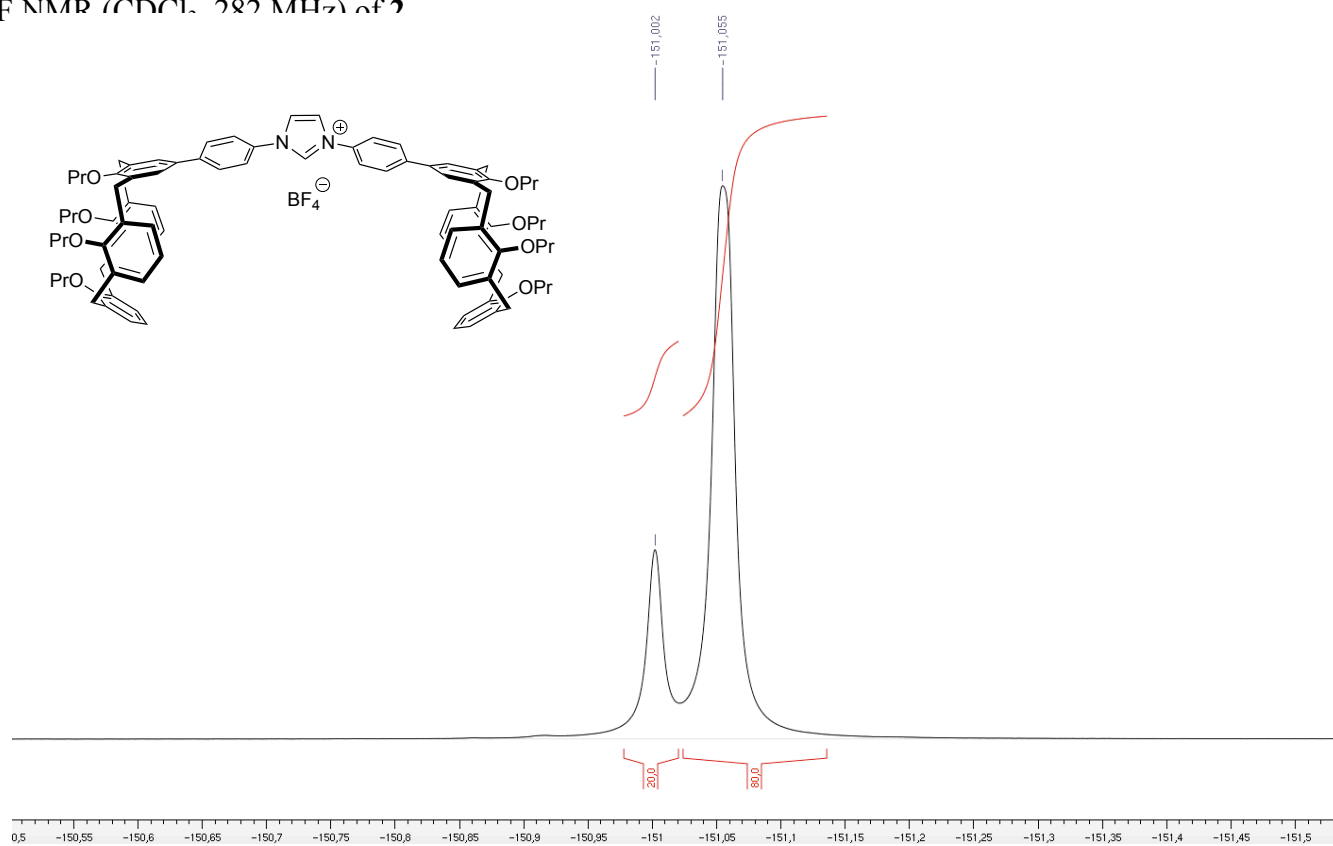

$^1\text{H}$  NMR ( $\text{CDCl}_3$ , 500 MHz) of **3**

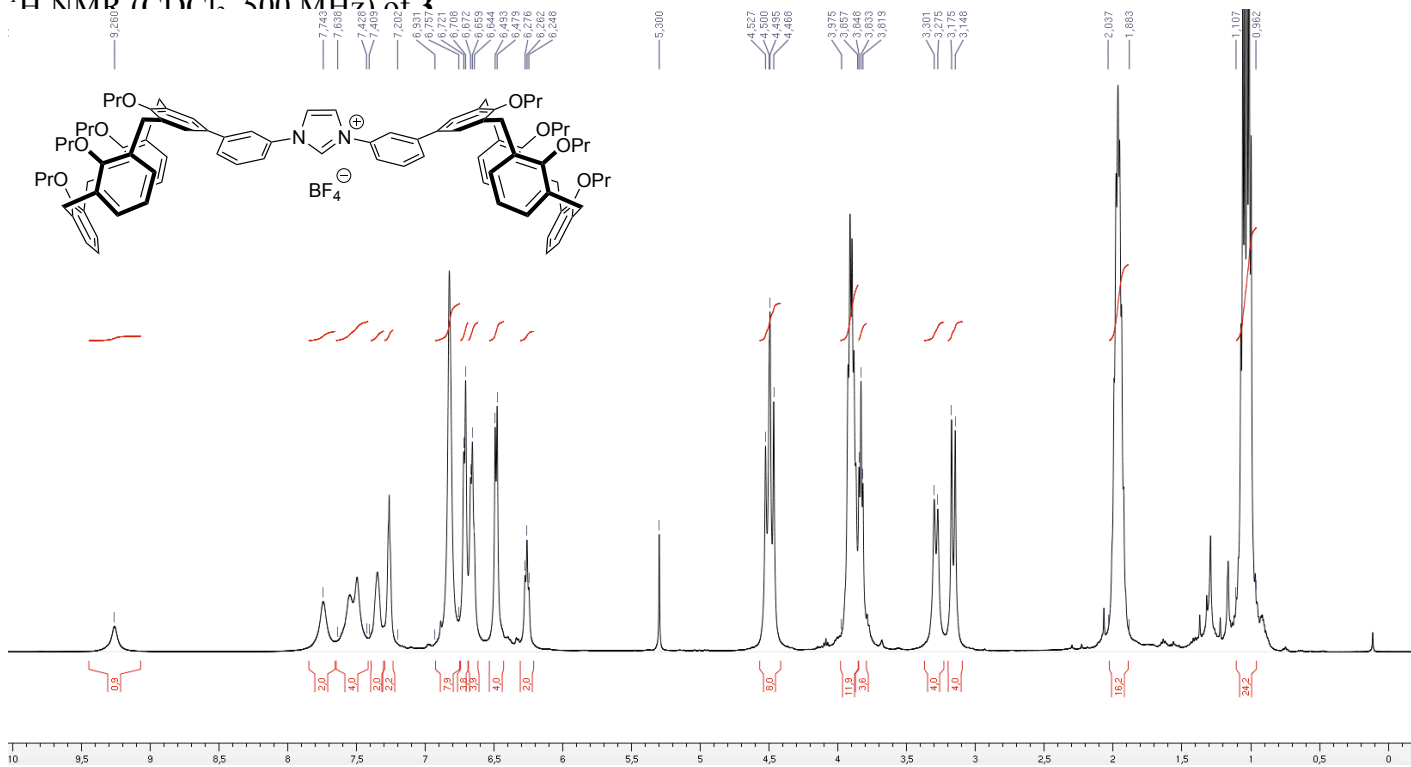

$^{13}\text{C}\{^1\text{H}\}$  and DEPT NMR ( $\text{CDCl}_3$ , 125 MHz) of **3**

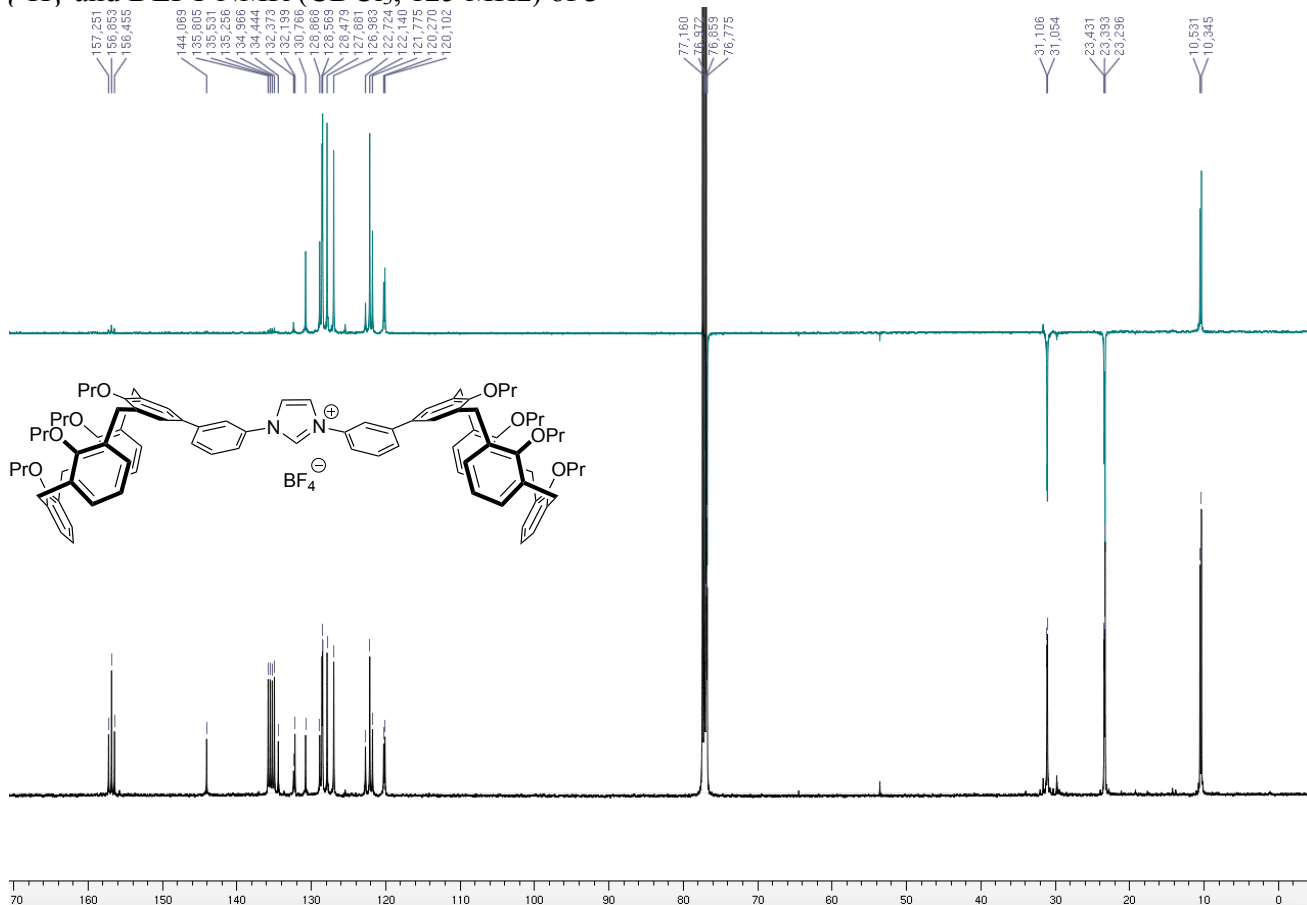



$^{19}\text{F}$  NMR ( $\text{CDCl}_3$ , 282 MHz) of **3**

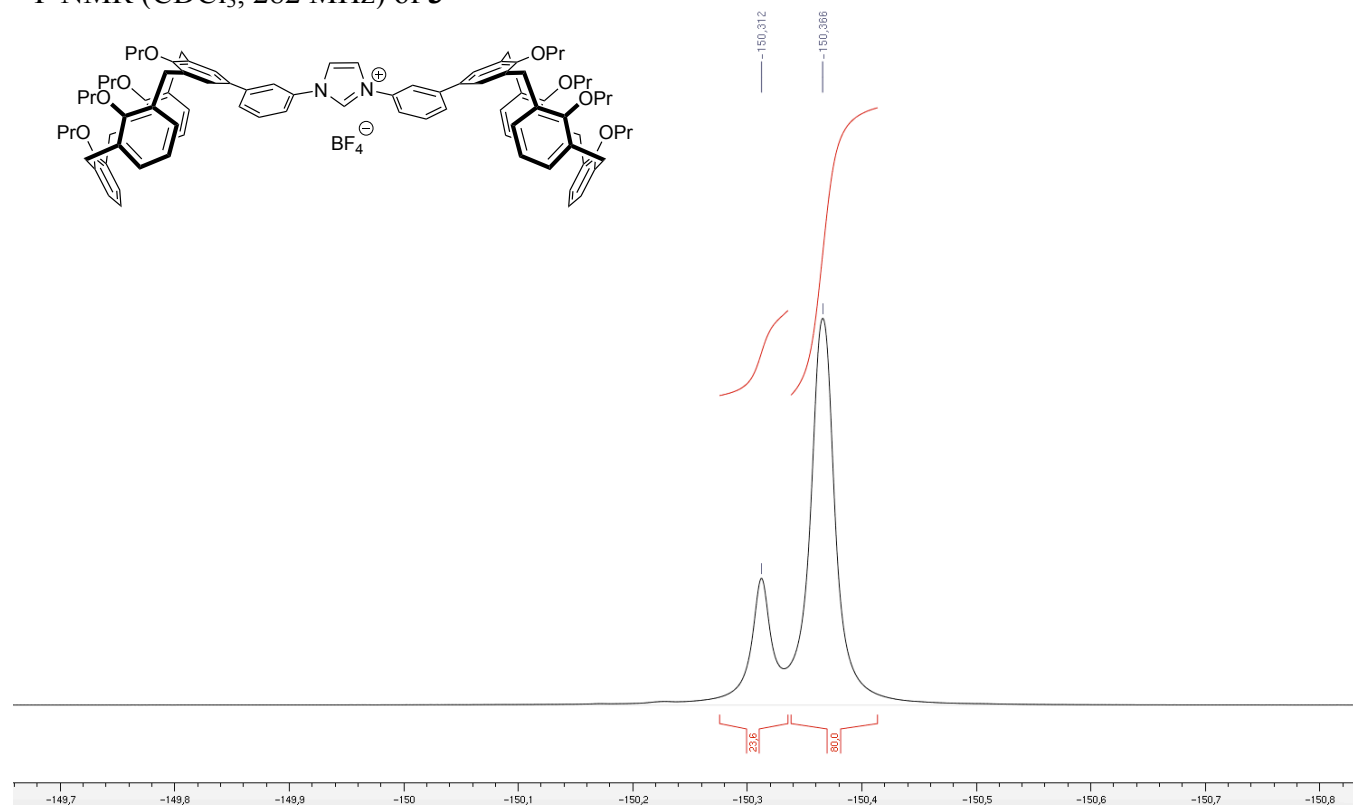

<sup>1</sup>H NMR (CDCl<sub>3</sub>, 500 MHz) of **8**

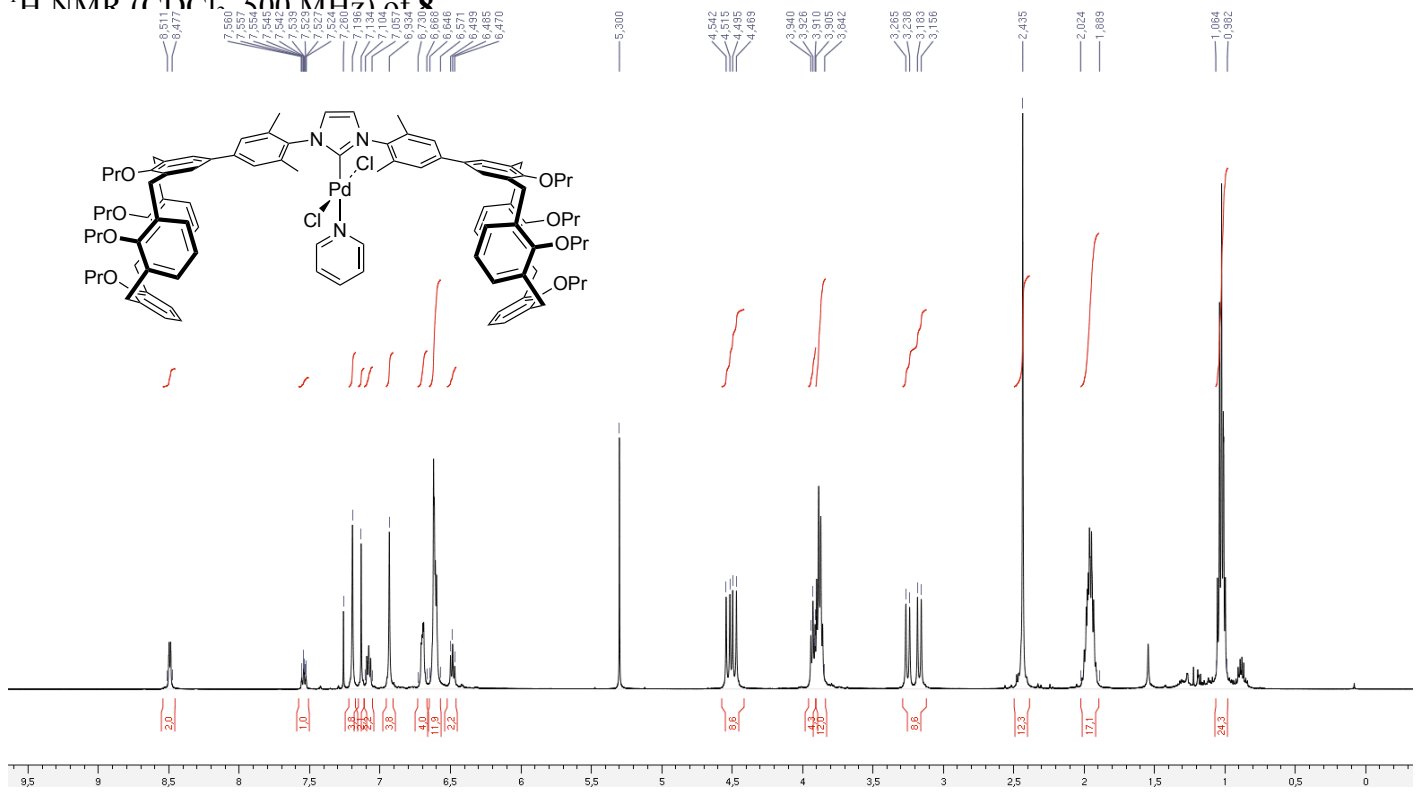

<sup>13</sup>C<sup>1</sup>H and DEPT NMR (CDCl<sub>3</sub>, 125 MHz) of **8**

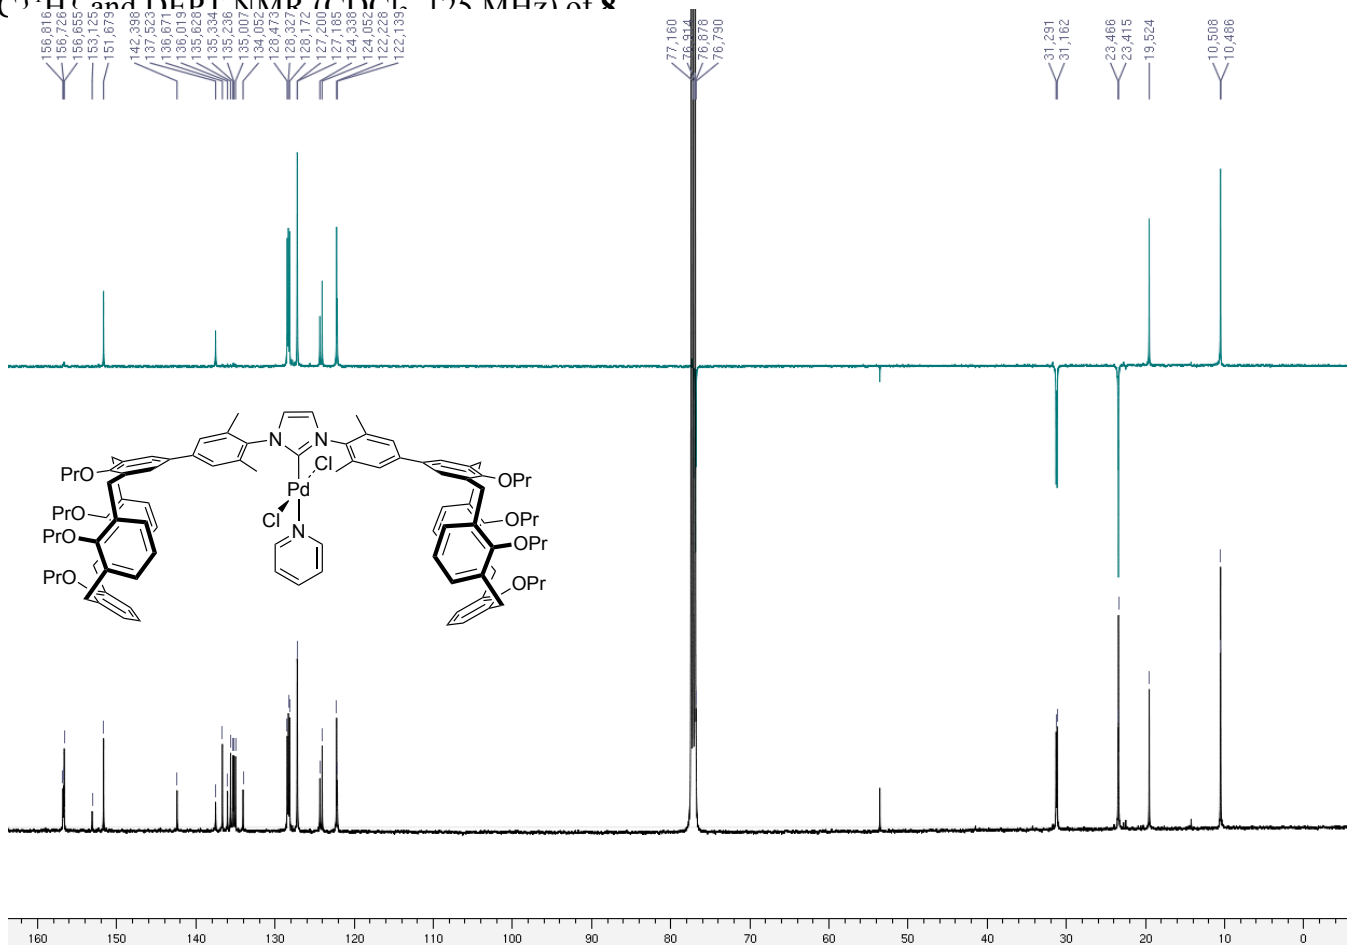

<sup>1</sup>H NMR (CDCl<sub>3</sub>, 500 MHz) of **6**

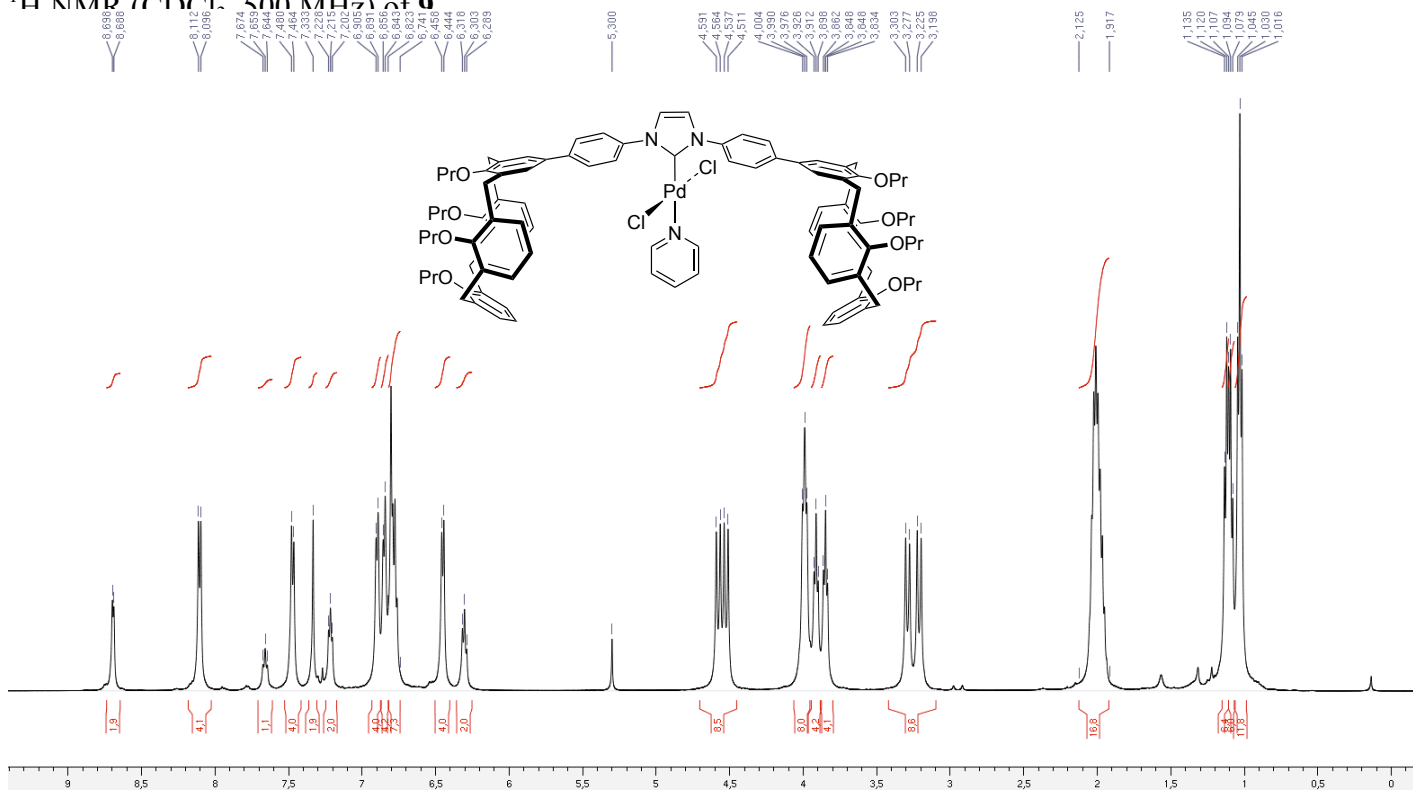

<sup>13</sup>C NMR and DEPT NMR (CDCl<sub>3</sub>, 125 MHz) of **6**

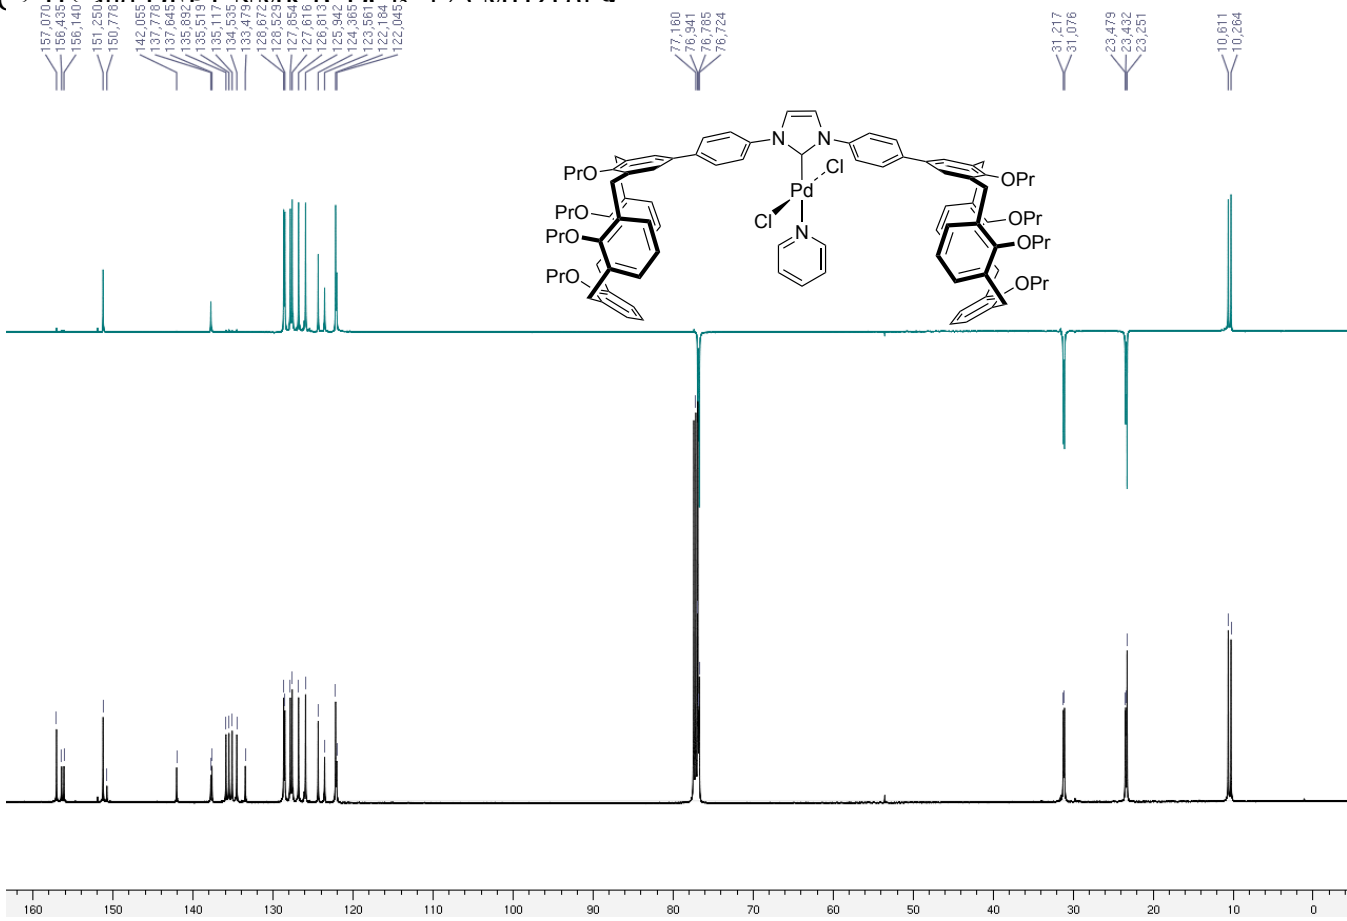

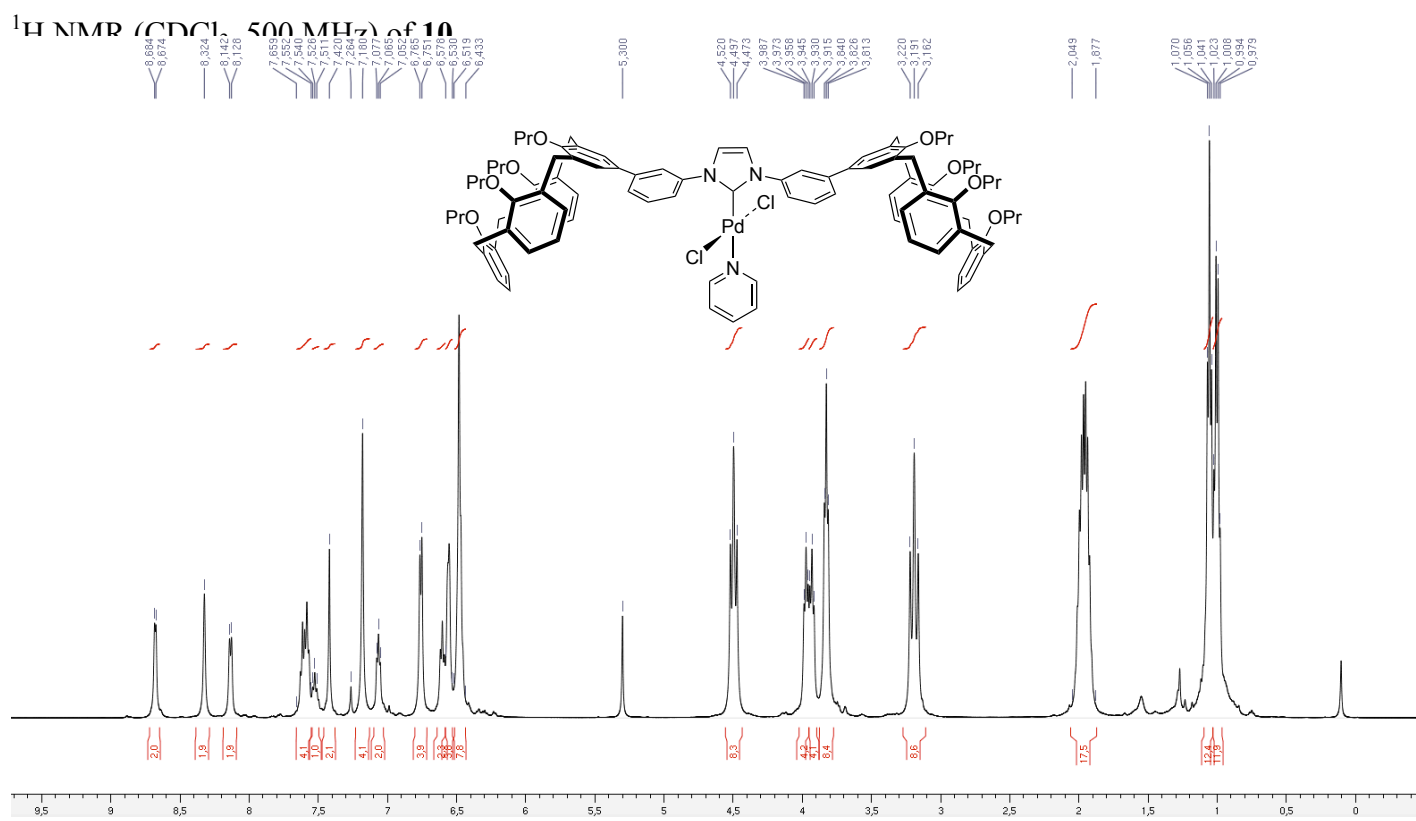

<sup>13</sup>C{<sup>1</sup>H} and DEPT NMR (CDCl<sub>3</sub>, 125 MHz) of **10**

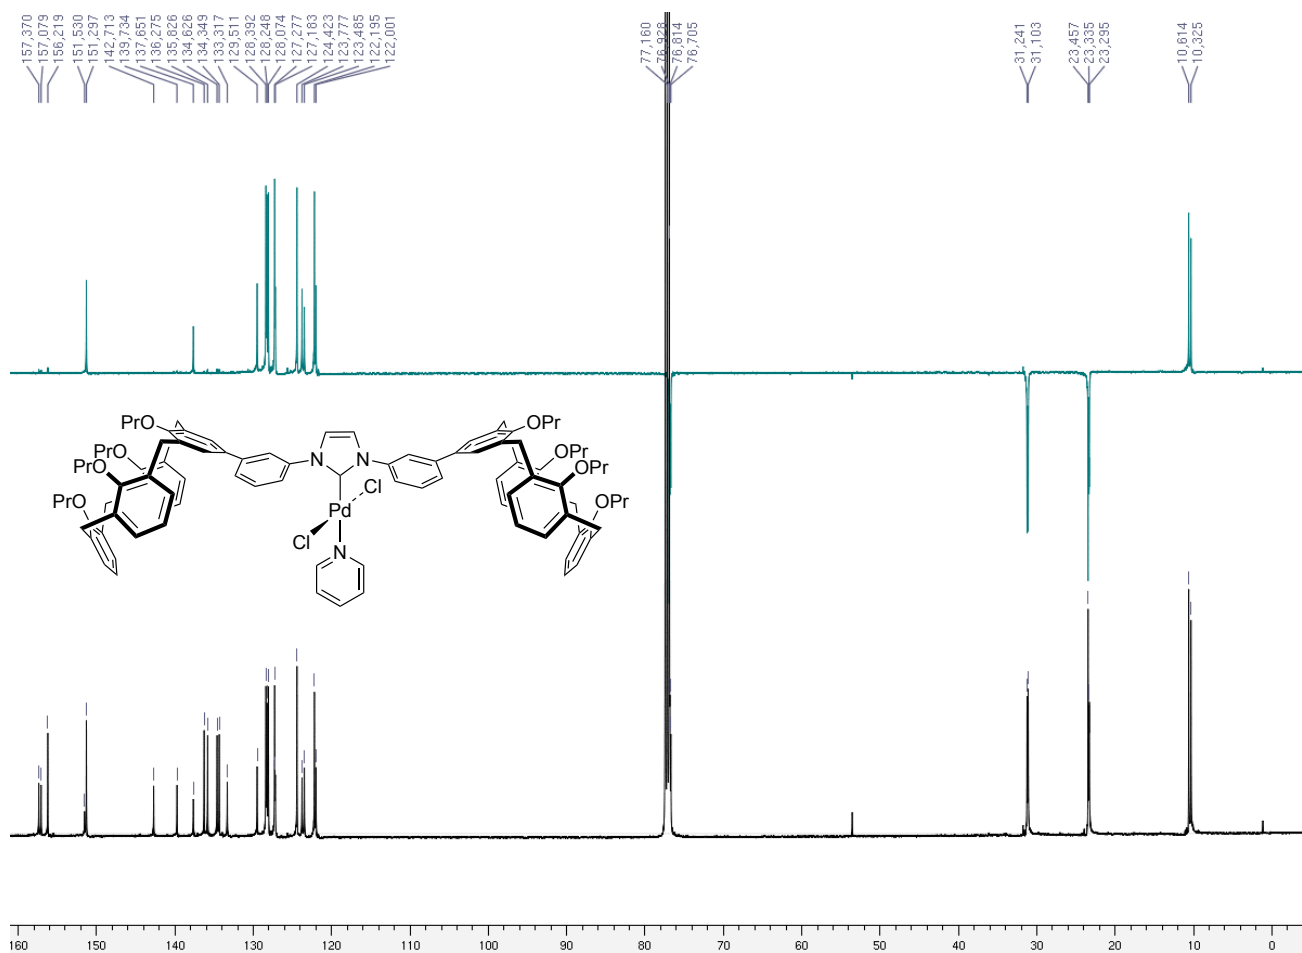

Calculated, optimised structure of complex **9** (with the propyl groups replaced with methyl groups)

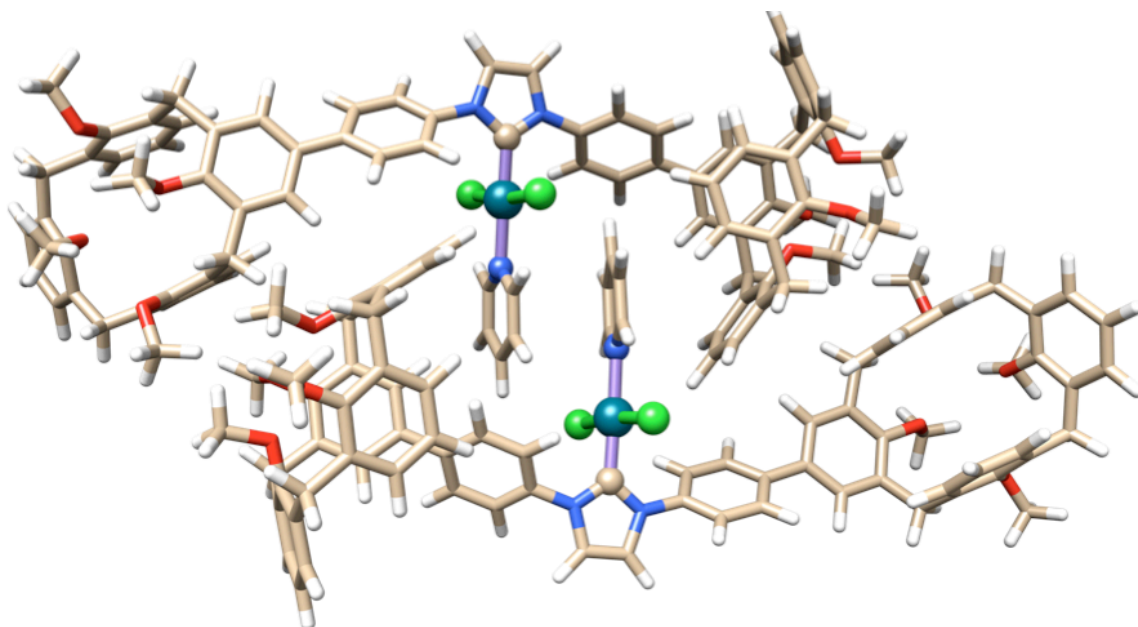

Supplement: mmc1 [file mmc1.pdf]
